1 **Title: Efficacy and Safety of a Plant-Based Virus-Like Particle Vaccine for**  
2 **COVID-19 Adjuvanted with AS03**

3  
4 **Authors:** Karen Joyce Hager<sup>1</sup>, Gonzalo Pérez Marc<sup>2</sup>, Philippe Gobeil<sup>1</sup>, Ricardo Sobhie  
5 Diaz<sup>3</sup>, Gretchen Heizer<sup>1</sup>, Conrado Llapur<sup>4</sup>, Alexander I. Makarkov<sup>1</sup>, Eduardo  
6 Vasconcellos<sup>5</sup>, Stephane Pillet<sup>1</sup>, Fernando Riera<sup>6</sup>, Kapil Bhutada<sup>1</sup>, Priscila Geller  
7 Wolff<sup>7</sup>, Garry Wallace<sup>8</sup>, Hessam Aazami<sup>9</sup>, Christine E. Jones<sup>10</sup>, Fernando P. Polack<sup>11</sup>,  
8 Judith Atkins<sup>1</sup>, Iohann Boulay<sup>1</sup>, Jiwanjeet Dhaliwall<sup>1</sup>, Nathalie Charland<sup>1</sup>, Manon  
9 Couture<sup>1</sup>, Julia Jiang-Wright<sup>1</sup>, Nathalie Landry<sup>1</sup>, Sophie Lapointe<sup>1</sup>, Aurélien Lorin<sup>1</sup>,  
10 Asif Mahmood<sup>1</sup>, Lawrence H. Moulton<sup>12</sup>, Emmy Pahmer<sup>1</sup>, Julie Parent<sup>1</sup>, Pooja Saxena<sup>1</sup>,  
11 Annie Séguin<sup>1</sup>, Luan Tran<sup>1</sup>, Thomas Breuer<sup>13</sup>, Maria Angeles Ceregido<sup>13</sup>, Marguerite  
12 Koutsoukos<sup>13</sup>, François Roman<sup>13</sup>, Junya Namba<sup>1</sup>, Marc-André D'Aoust<sup>1</sup>, Sonia  
13 Trepanier<sup>1</sup>, Yosuke Kimura<sup>1</sup>, The CoVLP Study Team, Brian J. Ward<sup>1,14\*</sup>.

14  
15 <sup>1</sup> Medicago Inc., 1020 route de l'Église, Bureau 600, Québec, QC, Canada, G1V 3V9

16 <sup>2</sup> Hospital Militar Central Cirujano Mayor Dr. Cosme Argerich, Av. Luis Maria  
17 Campos 726, Buenos Aires Buenos Aires C1426, Argentina

18 <sup>3</sup> Infectious Diseases Division, Paulista School of Medicine, Federal University of Sao  
19 Paulo, Brazil, and Azidus Brasil Pesquisa e Desenvolvimento Ltda, Valinhos São Paulo  
20 13271-130, Brazil

21 <sup>4</sup> Clinica Mayo de UMCB SRL, Combate de San Lorenzo 449, San Miguel de Tucumán  
22 Tucumán T4000, Argentina

23 <sup>5</sup> Instituto de Pesquisas Clinicas L2IP, SGAS 613 - lote 95 - Bloco A, Sala 6, Ed. L2

24 Complexo Médico Hospitalar, DF 70200-730, Brazil

25 <sup>6</sup> Sanatorio Allende, Av. Hipolito Yrigoyen 384, Cordoba, Cordoba 5000, Argentina

26 <sup>7</sup> IBPClin Instituto Brasil de Pesquisa Clinica, R. Da Gloria, 344 – Gloria, Rio de Janeiro

27 RJ 20241-180, Brazil

28 <sup>8</sup> Dawson Clinical Research Inc., 83 Dawson Road, Guelph, Ontario N1H 1B1, Canada

29 <sup>9</sup> Hope Clinical, 22030 Sherman Way, Canoga Park, California 91303, United States

30 <sup>10</sup> Clinical and Experimental Sciences, University of Southampton and NIHR

31 Southampton Clinical Research Facility and Biomedical Research Centre, University

32 Hospital Southampton NHS Foundation Trust, Tremona Road, Southampton, SO16

33 6YD, United Kingdom

34 <sup>11</sup> Fundacion INFANT, Gavilán 15, Buenos Aires, Argentina

35 <sup>12</sup> Department of International Health, Johns Hopkins Bloomberg School of Public

36 Health, 615 N. Wolfe St., Baltimore, MD 21217, USA.

37 <sup>13</sup> GlaxoSmithKline Vaccines, Wavre, Belgium

38 <sup>14</sup> Research Institute of the McGill University Health Center, 1001 Decarie St,

39 Montréal, QC, Canada H4A 3J1

40

41 \* Corresponding author:

42 Brian J. Ward

43 1020 Route de l'Église, Bureau 600

44 Québec, QC, Canada

45 G1V 3V9

46 Tel. 418 658 9393

47 Fax. 418 658 6699

48 wardb@medicago.com

49

50 **Keywords**

51 Phase 3, SARS-CoV-2, COVID-19 Vaccine, Virus-Like Particles, *Nicotiana*

52 *benthamiana*, Safety, Efficacy, Variants, Delta, Gamma, Cross-Protection

53 **Abstract**

54 **Background:** Several COVID-19 vaccines are currently being deployed but supply constraints,  
55 concerns over durability of immune responses, solidifying vaccine hesitancy/resistance and  
56 vaccine efficacy in the face of emerging variants mean that new vaccines continue to be needed  
57 to fight the ongoing pandemic. The vaccine described here is an enveloped, coronavirus-like  
58 particle produced in plants (CoVLP) that displays the prefusion-stabilized spike (S)  
59 glycoprotein of SARS-CoV-2 (ancestral Wuhan strain) and is adjuvanted with AS03  
60 (CoVLP+AS03).

61 **Methods:** This Phase 3 randomized, observer-blind, placebo-controlled trial was conducted at  
62 85 centers in Argentina, Brazil, Canada, Mexico, the UK, and the USA. Adults  $\geq 18$  years of  
63 age including those at high risk for COVID-19 complications were randomly assigned 1:1 to  
64 receive two intramuscular injections of CoVLP (3.75  $\mu$ g) adjuvanted with AS03 or placebo, 21  
65 days apart. The primary efficacy endpoint was prevention of symptomatic ( $\geq 1$  symptom),  
66 PCR-confirmed SARS-CoV-2 infection with onset at least 7 days after the second injection and  
67 was triggered by the identification of  $\geq 160$  virologically-confirmed cases. Tolerability and  
68 safety of CoVLP+AS03 were also determined.

69 **Results:** A total of 24,141 volunteers were randomly assigned 1:1 to receive vaccine or placebo  
70 (N= 12,074 and 12,067, respectively: median age 29, range 18 to 86 years). Overall, 83%  
71 received both doses. 14.8% were SARS-CoV-2 seropositive at baseline. Symptomatic SARS-  
72 CoV-2 infection was confirmed in 165 study participants in the intention to treat (ITT) set and  
73 157 in the per-protocol population (PP) set. Of the 157 in the PP set, 118 COVID-19 cases were  
74 in the placebo group and 39 COVID-19 cases were in the CoVLP+AS03 group for an overall  
75 vaccine efficacy (VE) of 71.0% (95% confidence interval (CI) 58.6, 80.0). Moderate-to-severe  
76 COVID-19 occurred in 8 and 32 participants in the CoVLP+AS03 and placebo groups,  
77 respectively: VE 78.1% (95% CI: 53.9, 90.5) in the PP set overall and 84.5% (95% CI: 62.0,  
78 94.7) in those seronegative at recruitment.

79 To date, 100% of the sequenced strains (122/165 cases: 73.39%) were variants, dominated by  
80 Delta (45.9%) and Gamma (43.4%) strains. Vaccine efficacy by variant was 75.3% (95% CI  
81 52.8, 87.9) against Delta and 88.6% (95% CI 74.6, 95.6) against Gamma. Cross-protection was  
82 also observed against Alpha, Lambda and Mu variants; although fewer cases were identified,  
83 all were in the placebo group. At diagnosis, viral loads in the CoVLP+AS03 breakthrough  
84 cases were  $>100$ -fold lower than in the placebo cases. Reactogenicity data for solicited adverse

85 events (AEs) was analysed for a subset (N=4,136 in vaccine arm and N=3,683 for placebo) of  
86 participants. Reactogenicity was mostly mild to moderate, and transient, and occurred more  
87 frequently in the CoVLP+AS03 group. The safety analysis set used for unsolicited AE  
88 assessment comprised 24,076 participants who received at least one study injection: 12,036  
89 received CoVLP+AS03 and 12,040 received placebo. All serious adverse events were assessed  
90 as unrelated, except two events reported in the same subject in the placebo group. No  
91 significant imbalance or safety concern was noted in medically attended AEs (MAAEs),  
92 adverse event of special interest (AESIs), AEs leading to withdrawal, deaths, or adverse events  
93 potentially associated with currently authorized vaccines.

94 **Conclusions:** The CoVLP+AS03 vaccine candidate conferred an efficacy of 71.0% in  
95 preventing symptomatic SARS-CoV-2 infection caused by a spectrum of variants. Vaccine  
96 efficacy of 78.1% was observed against moderate and severe disease, while variant-specific  
97 efficacy ranged from 75.3% to 100%. Markedly lower viral loads in the CoVLP+AS03 group at  
98 the time of diagnosis suggests a significant virologic impact of vaccination even in the  
99 breakthrough cases. CoVLP+AS03 vaccine candidate was well tolerated, and no safety  
100 concerns were identified during the study. If approved by regulators, this more traditional  
101 protein+adjuvant vaccine produced using the novel plant-based platform may be able to make  
102 an important contribution to the global struggle against the increasingly complex family of  
103 SARS-CoV-2 viruses (Funded by Medicago with grants from the governments of Quebec and  
104 Canada; NCT04636697).

## 105 **Introduction**

106 Since its emergence in late 2019 <sup>1</sup>, the severe acute respiratory syndrome coronavirus 2 (SARS-  
107 CoV-2) has caused more than 312 million cases of coronavirus disease 2019 (COVID-19)  
108 globally with >5.5 million deaths <sup>2</sup>. A massive global effort began almost immediately upon  
109 recognition of the new virus that resulted in the development of a large diversity of vaccine  
110 candidates based on mRNA, non-replicating adenovirus-vectored, attenuated and inactivated  
111 viruses, and adjuvanted protein-based platforms <sup>3</sup>. The spike (S) glycoprotein contains a  
112 receptor binding domain (RBD) that binds to human angiotensin-converting enzyme 2 (ACE2)  
113 receptor which initiates viral fusion and entry into host cells <sup>4,5</sup>. Neutralizing antibodies (NAb)  
114 directed against the S protein provide protection from other highly pathogenic coronaviruses  
115 (e.g.: SARS-CoV-1, MERS) and similar protective efficacy was rapidly demonstrated with  
116 anti-S antibodies in SARS-CoV-2 infection <sup>6</sup>. Consequently, the S protein is the target for  
117 almost all COVID-19 vaccines except for attenuated and inactivated virus-based vaccine  
118 candidates. Phase 3 clinical trials launched during the first waves of the pandemic generally  
119 demonstrated high vaccine efficacy against the ancestral (Wuhan) SARS-CoV-2 strain <sup>7</sup>.  
120 Several vaccines have since been deployed around the world with considerable success <sup>8-10</sup> and  
121 acceptable safety profiles despite some concerns regarding rare cases of myocarditis and  
122 pericarditis after mRNA vaccines <sup>11</sup> and thrombotic events associated with some adenovirus  
123 vectored vaccines <sup>12</sup> which have been added to the prescribing information. However, the  
124 reduced protection reported more recently, from clinical trials and subsequent real-world data  
125 <sup>13-17</sup>, may be due to a combination of reduced cross-reactivity of vaccine-induced antibodies  
126 against emerging SARS-CoV-2 variants and waning vaccine-induced humoral immunity with  
127 time, especially for mild disease <sup>18,19</sup>. A third dose (booster) of the mRNA vaccines has been  
128 reported to restore serum NAb levels and improve cross-protection against emerging variants,  
129 especially against the most severe outcomes <sup>20</sup>. Tensions created by the simultaneous demand  
130 for booster doses in countries with largely immunized populations and the need to provide  
131 primary vaccination to the majority of the world's unvaccinated populations <sup>6,21,22</sup> emphasize  
132 the need for additional vaccines and vaccine suppliers to fully meet the global demand.  
133 Alternative vaccine options that can be used under routine storage and handling conditions (2-  
134 8°C) or that can overcome the concerns of individuals who hesitate to get vaccinated with  
135 currently licensed vaccines based on novel platform technologies due to medical conditions or  
136 beliefs <sup>23</sup> would also be useful.

137 Virus-like particles (VLP)-based vaccine have been highly successful against several viral  
138 pathogens such as the Hepatitis B virus and the Human Papillomavirus <sup>24</sup>. Medicago has  
139 developed a plant-based production platform to generate VLPs for a range of viral pathogens  
140 including enveloped VLP candidates for pandemic and seasonal influenza that have  
141 demonstrated substantial immunogenicity or efficacy in human studies <sup>25-29</sup>. This vaccine  
142 manufacturing platform uses transient transfection of *Nicotiana benthamiana*, a common  
143 Australian plant and a disarmed *Agrobacterium tumefaciens* vector to deliver the episomal  
144 DNA encoding the vaccine protein to the plant cell nucleus <sup>30</sup>. Expression of the full-length,  
145 pre-fusion-stabilized SARS-CoV-2 S protein (ancestral Wuhan strain) in plant cells results in  
146 the spontaneous formation of 100-150 nm enveloped VLPs (hereafter referred to as CoVLP).  
147 Once purified, CoVLP is stable for at least 6 months under routine vaccine  
148 storage/transportation conditions (2-8°C). The Adjuvant System 03 (AS03) is an established  
149 adjuvant manufactured by GlaxoSmithKline (GSK). AS03 initiates a transient innate response  
150 at the injection site and the draining lymph node in animal models <sup>31</sup>, and in human peripheral  
151 blood cells<sup>32-34</sup>. This innate immune activity potentiates and shapes both the humoral and cell-  
152 mediated adaptive responses to the vaccine antigen, resulting in increased magnitude, quality  
153 (e.g.: antibody avidity), breadth and durability of the immune responses <sup>35-39</sup>. AS03 has been  
154 used to adjuvant pandemic A/H1N1pdm09 influenza vaccines (>90 million doses pandemic  
155 influenza vaccines have been administered worldwide), as well as in other licensed vaccines or  
156 vaccine candidates <sup>40</sup>. AS03-adjuvanted CoVLP (CoVLP+AS03) has been shown to induce  
157 strong and durable neutralizing antibody responses, as well as a balanced IFN- $\gamma$ /IL-4 T cell  
158 response <sup>41,42</sup>, both of which are likely to be important in protecting against SARS-CoV-2  
159 infection <sup>43</sup>.

160 We report herein the results of the pivotal Phase 3 portion of a Phase 2/3 study in which the  
161 safety and efficacy of CoVLP+AS03 were evaluated in 24,141 adult participants  $\geq 18$  years of  
162 age recruited between March 15<sup>th</sup>, 2021, and September 2<sup>nd</sup>, 2021, in six countries across three  
163 continents (Europe, North and South America). This placebo-controlled trial was conducted  
164 during an evolving pandemic environment with active circulation of several variants of concern  
165 and of interest, as well as increasing vaccine roll-out.

166

167

168 **Methods**

169 *Trial Objectives and Oversight*

170 The trial is being conducted in accordance with current International Conference on  
171 Harmonization (ICH) guidelines on Good Clinical Practice, and applicable country-specific  
172 regulatory requirements. All participants provided written informed consent before being  
173 enrolled. An independent Institutional Review Board (IRB) or Ethics Committee (EC)  
174 approved the protocol, protocol amendments and consent forms. Safety and efficacy data, as  
175 required by protocol, was reviewed by an Independent Data Monitoring Committee (IDMC) as  
176 needed.

177 The objectives of the randomized, observed-blinded, placebo-controlled Phase 3 portion of the  
178 trial were the determination of efficacy, safety and, in a subset of participants, immunogenicity  
179 of CoVLP+AS03. The trial involved 85 sites in Argentina, Brazil, Canada, Mexico, the United  
180 Kingdom, and the United States of America. Once at least 160 laboratory-confirmed COVID-  
181 19 cases ( $\geq 7$  days post second vaccination) were collected, and a median safety follow-up of at  
182 least 2 months (post second dose) was achieved in at least 3,000 participants in each of the  
183 CoVLP+AS03 and placebo groups, the database was cleaned, a snapshot was taken, and the  
184 primary efficacy results were calculated. The cut-off dates for inclusion in the vaccine efficacy  
185 analyses and safety analyses were August 20<sup>th</sup>, 2021 and October 25<sup>th</sup>, 2021, respectively.

186 Medicago Inc. was responsible for the overall trial design and oversight, as well as the  
187 manufacture of CoVLP. GSK was responsible for the manufacture of AS03 and providing input  
188 into trial design. Site selection and monitoring and conduct of the trial was delegated by  
189 Medicago to Syneos (Canada). Data were collected by site investigators (complete list of  
190 investigators provided in supplementary materials). Data were centralized and analyzed in  
191 conjunction with Syneos. PCR testing and genetic analysis of viral samples was performed by  
192 Viroclinics-DDL (Netherlands).

193 Safety oversight was provided by the Safety Monitoring Team (SMT) that reviewed safety data  
194 on a regular basis in a blinded manner. This included data on AESIs including potential  
195 Immune Mediated Disorders (pIMDs), Anaphylaxis and severe allergic reactions, Vaccine-  
196 associated enhanced diseases (VAED), or Vaccine-associated enhanced respiratory diseases  
197 (VAERD), with triggers in place to escalate to the IDMC if a potential safety signal was  
198 identified. In parallel an unblinded medical monitor was reviewing unblinded data on a real  
199 time basis to escalate to the IDMC if a stopping rule was met. The safety and efficacy data were



200 also reviewed by the IDMC, to confirm that the primary efficacy endpoint had been met, and  
201 that the benefit/risk profile was positive.

202 The trial is ongoing and, at the time of writing, the investigators remained unaware of  
203 participant-level treatment assignments. Limited team members have unblinded access to the  
204 data to facilitate submission of clinical safety findings to regulatory agencies and the IDMC.  
205 All other trial staff and participants remain unaware of treatment assignments.

206

### 207 *Participants and Randomization*

208 Study participants were adults aged 18 years or older and included younger adults aged 18-64  
209 (Population 1), older adults aged 65 or more (Population 2) and adults aged 18 or more with  
210 significant comorbidities (Population 3). High-risk comorbidities in Population 3 included, but  
211 were not limited to obesity, hypertension, diabetes (type 1 or 2), chronic obstructive pulmonary  
212 disease, cardiovascular disease, asthma and immunocompromise due to treatment-controlled  
213 HIV, organ transplant, or receipt of cancer chemotherapy (full details in Supplementary Table  
214 S2). Participants had not previously received any SARS-CoV-2 vaccine and must not have had  
215 a history of virologically confirmed COVID-19. Full inclusion and exclusion criteria are  
216 detailed in the trial protocol (available in supplementary materials).

217 Participants were assigned in a 1:1 ratio to receive either CoVLP+AS03 or placebo. The  
218 vaccine candidate or placebo (0.5 mL) were injected intramuscularly, 21 days apart, in  
219 contralateral (when possible) deltoid muscles by an unblinded site staff member. Participants  
220 were observed by blinded site staff responsible for safety evaluations for 30 minutes after each  
221 vaccination.

222

### 223 *Trial Vaccine*

224 The CoVLP vaccine candidate, previously described in detail <sup>42</sup>, is composed of full-length  
225 spike (S) protein in a pre-fusion stabilized configuration from SARS-CoV-2 (strain hCoV-  
226 19/USA/CA2/2020) incorporating the modifications: R667G, R668S, R670S, K971P, and  
227 V972P expressed in the leaves of *Nicotiana benthamiana* by *Agrobacterium*-based transient  
228 transfection. High-level expression of the S protein results in formation of S trimers at the  
229 plasma membrane followed by spontaneous budding of CoVLPs. AS03 adjuvant is an oil-in-  
230 water emulsion containing DL- $\alpha$ -tocopherol and squalene, supplied by GSK. Immediately prior

231 to use, 2.5 mL of CoVLP and 2.5 mL of AS03 are mixed in a multidose vial to obtain 10  
232 vaccine doses of 0.5 mL each. Each dose of the vaccine contained 3.75 µg of CoVLP  
233 formulated in phosphate-buffered saline (PBS) with polysorbate 80, 11.86 mg of DL-α-  
234 tocopherol and 10.69 mg of squalene. The placebo was composed of 0.5 mL PBS with  
235 polysorbate 80.

236

### 237 *Safety Assessments*

238 The safety analysis included all data collected as of October 25<sup>th</sup>, 2021. The safety analysis set  
239 (SAS) used to evaluate unsolicited data including AESIs and SAEs comprised 24,076  
240 participants: 12,036 in the CoVLP+AS03 arm, and 12,040 in the placebo arm. Reactogenicity  
241 data for solicited AEs were analysed for a subset (N=4,136 in vaccine arm and N=3,683 for  
242 placebo) of participants who had received both doses following the protocol-prescribed dosing  
243 regimen and who had completed at least 2 months of safety follow-up, post dose 2.

244 Solicited local or systemic adverse events within 7 days of receiving each dose were collected  
245 using paper or electronic diaries. Unsolicited AEs were monitored for 21 days after each dose,  
246 while SAEs, MAAEs, AEs leading to withdrawal, AESIs (including VAED/VAERD,  
247 anaphylaxis and severe allergic reactions, pIMDs), and deaths are being monitored throughout  
248 the study. AE grading criteria as well as pre-defined study specific stopping rules for safety  
249 reasons are detailed in the clinical study protocol (available in supplementary materials).

250

### 251 *Efficacy Assessments*

252 The primary efficacy endpoint was the prevention of symptomatic SARS-CoV-2 infection  
253 seven or more days after receipt of the second dose (Primary Vaccine Efficacy; PVE). COVID-  
254 19 cases were adjudicated by a subcommittee of the IDMC, blind to group assignment, and  
255 were defined by the presence of at least one of the following symptoms: fever or chills, cough,  
256 shortness of breath or difficulty breathing, fatigue, muscle or body aches, headache, loss of  
257 taste or smell, sore throat, congestion or runny nose, nausea or vomiting, diarrhea, and a  
258 positive SARS-CoV-2 test (on nasopharyngeal (NP) or nasal swabs) by quantitative reverse-  
259 transcriptase polymerase chain reaction (qRT-PCR) performed by a central virological  
260 laboratory (ViroClinics-DDL: Rotterdam, Netherlands) that provided both qualitative (i.e.:  
261 positive-negative) and quantitative results (i.e.: viral load: copies/mL; cp/ml).

262 Efficacy assessments that can be reported at this time are vaccine efficacy in preventing  
263 laboratory-confirmed moderate and severe COVID-19, viral load at the time of diagnosis, and  
264 efficacy of the vaccine in preventing laboratory-confirmed COVID-19 by variants seven days  
265 or more after the second dose. COVID-19 severity assessment was based on FDA guidance  
266 criteria and severe COVID-19 was further defined in the protocol.

267 Viral load was determined by Viroclinics using RT-qPCR targeting the nucleocapsid gene.  
268 Primers and assay conditions were based on CDC N1 assay <sup>44</sup>. The resulting cycle threshold  
269 (Ct) values were plotted against a four-point standard curve with a known number of log<sub>10</sub>  
270 cp/mL run together with the real-time PCR. Ct values were converted to log<sub>10</sub> cp/mL based on  
271 the slope and intercept of the standard curve for each analysis.

272

### 273 *Viral Sequencing*

274 Sequencing of viral genomes from swabs was performed by Viroclinics-DDL. Total nucleic  
275 acid was extracted from samples using MagMAX™ Total Nucleic Acid Isolation Kits  
276 (ThermoFisher) and full-length amplification of the target RNA, i.e., RNA encoding S, was  
277 performed by nested RT-PCR. Next-generation sequencing platforms (MiSeq and NextSeq  
278 Illumina) were deployed to analyze the sequences of the amplicons and the SARS-CoV-2  
279 Wuhan-Hu-1 (GenBank: MN908947.3) was used as the reference sequence for amplicon  
280 mapping. A detailed protocol is included in the supplementary material section.

281

### 282 *Statistical Analysis*

283 The full statistical analysis plan is included as a supplementary material.

284 Safety analyses were descriptive in nature and summarized as counts and percentages. No  
285 statistical tests were performed. Safety analyses presented herein include solicited and  
286 unsolicited adverse events occurring on or after vaccination and coded as per Medical  
287 Dictionary for Regulatory Activities (MedDRA) v24.0.

288 Efficacy analyses of the primary endpoint included all laboratory confirmed cases that met the  
289 definition of a COVID-19 case as adjudicated by the IDMC subcommittee. In order for a  
290 COVID-19 case to be considered as a primary endpoint, symptoms had to start 7 or more days  
291 after second dose and before the subject was unblinded to study treatment or was administered  
292 a currently deployed COVID-19 vaccine. Symptom start was required to occur on or before

293 August 20<sup>th</sup>, 2021, to be included in the analysis of the primary endpoint. The IDMC  
294 subcommittee provided confirmation that a COVID-19 case met the requirements for the  
295 primary endpoint and assessed severity according to FDA criteria <sup>45</sup>.

296 Vaccine efficacy was calculated as  $100 \times (1 - \text{incidence rate ratio})$  where the incidence rate  
297 ratio is defined as the ratio of person-years rate of COVID-19 cases in the CoVLP+AS03 group  
298 relative to the COVID-19 cases in the placebo group. For both analysis sets, censoring was  
299 performed at the earlier of any of the following events, namely, when the subject experienced  
300 their first virologically confirmed COVID-19 case (date of first symptoms), the study database  
301 was frozen for the primary analysis, the date subject was unblinded, the date subject received  
302 an approved or authorized COVID-19 vaccine, or the date of subject completion/withdrawal  
303 from the study. The VE success criterion for the primary efficacy endpoint was defined as a  
304  $\geq 50$  %-point estimate and a  $>30$  % lower limit of the 95% CI. Assuming the number of cases in  
305 each arm followed a Poisson distribution, then conditioning on the total number of cases and  
306 the ratio of person-time of follow up, the exact 95% CIs for the incidence rate ratio (IRR), and  
307 hence for  $VE = 1 - IRR$ , was obtained assuming a binomial distribution with mid-P adjustment  
308 <sup>46</sup>. Vaccine efficacy for the secondary endpoints was analyzed using the same methods as for  
309 the primary endpoint, except for VE success criterion being defined as  $>0\%$  lower limit of the  
310 95% CI. Cumulative incidence curves were calculated using the Kaplan-Meier method.

311 Median differences in viral load values measured as  $\log_{10}$  copies/mL were compared between  
312 subjects who received CoVLP+AS03 or placebo by strain and overall using the Wilcoxon rank-  
313 sum test. Viral load values under the detection limit ( $\log_{10}$  2.08) were set to half of that limit.

314

315

316 **Results**

317 *Context in which the study was performed*

318 Unlike many earlier Phase 3 efficacy studies, the current trial was conducted at a time of actual  
319 or anticipated roll-out of one or more emergency-use SARS-CoV-2 vaccines. Although the  
320 pace and penetration of these roll-out campaigns varied widely across countries and regions, the  
321 recruitment of elderly volunteers and those with high-risk comorbidities became progressively  
322 more difficult over time, leading to much smaller numbers of participants among healthy older  
323 adults and adults with comorbidities than originally planned. Furthermore, as countries/regions  
324 enlarged the populations eligible for vaccination, a steadily growing number of enrolled  
325 participants in all study populations chose to exercise their Protocol-sanctioned option to be  
326 unblinded in order to access a deployed vaccine. This led to a progressive loss of participants in  
327 both arms of the study through early withdrawal and unblinding with a growing imbalance  
328 between the CoVLP+AS03 and placebo arms of the study that was managed by using person-  
329 year denominators to calculate all efficacy outcomes, thus taking into account the accrued  
330 amount of follow-up for each participant in the study. These impacts were anticipated in the  
331 study design that sought to capture cases as quickly as possible to minimize delays in providing  
332 vaccines to placebo recipients and mitigate the risk of withdrawals/unblinding events. Among  
333 the important design elements was the use of a single COVID-19-compatible symptom to  
334 trigger PCR testing that likely led to early identification of cases as well as the detection of a  
335 high proportion of minimally symptomatic cases. Finally, unlike many of the early randomized-  
336 controlled trials (RCT) of candidate SARS-CoV-2 vaccines that were confronted with either the  
337 ancestral (Wuhan) strain only or a limited spectrum of variants, the current study was  
338 performed at a time of active viral evolution and the circulation of multiple variants with  
339 increased transmissibility<sup>47</sup>, resistance to vaccine-induced immunity or both (see  
340 Supplementary Figure 1).

341

342 *Demographic and baseline clinical characteristics*

343 Participants  $\geq 18$  years of age were tested for SARS-CoV-2 antibodies at 85 sites in the USA  
344 (N=41), Canada (N=14), the United Kingdom (N=11), Brazil (N=7), Mexico (N=7), and  
345 Argentina (N=5), using a commercial ELISA that targets the nucleocapsid (N) protein  
346 (ElecSys, Roche Diagnostics). Provided the participant had no previous history of virologically  
347 confirmed COVID-19, both seronegative and seropositive participants were enrolled.

348 Participant disposition and flow diagram are presented in Figure 1. Participant demographics in  
349 the PP set are presented in Table 1 and participant demographics in the ITT set are presented in  
350 Supplementary Table S1. Of the 25,170 individuals recruited, 24,141 were randomized (ITT  
351 set) and 24,076 received one or more study injections. Of these, 20,090 participants received  
352 two full vaccinations as scheduled (PP set): 18,150 healthy adults 18-64 years of age, 109  
353 healthy older adults aged 65 years or more (0.4%), and 1,831 adults  $\geq 18$  years of age with high-  
354 risk comorbidities (7.5%) (listed in Supplementary Table S2). In the PP set, 10,060 were male  
355 (50.1%) and 10,030 were female (49.9%). The racial distribution, in order of decreasing  
356 frequency, was 88.8% White or Caucasian, 7.0% Black or African American, 1.2% Asian,  
357 0.2% American Indian or Alaska Native, and  $<0.1\%$  Native Hawaiian or Other Pacific Islander.  
358 Two percent reported multiple races and  $<0.1\%$  reported other or had missing racial data.  
359 Overall, 83.3% of participants reported Hispanic or Latinx ethnicity, 16.3% were non-Hispanic  
360 or Latinx and 0.4% did not report their ethnicity. The median age was 29. The youngest  
361 participant was 18 and the oldest was 86.

362

### 363 *Efficacy*

364 Up to the cut-off date of August 20<sup>th</sup>, 2021, a total of 401 possible COVID-19 cases were  
365 identified in the study population. Of these, based on time of occurrence relative to vaccination,  
366 176 were predicted to potentially contribute to determination of the PVE endpoint.  
367 Adjudication confirmed the applicability of 165 of these cases (10 were removed due to  
368 unblinding prior to diagnosis of COVID-19 and 1 case was determined not to have met the  
369 PVE criteria). The PVE analysis was determined based on these 165 adjudicated cases (ITT set;  
370 157 in the PP set).

371 Among the 20,090 participants in the PP set, 118 in the placebo group (9,536 participants) and  
372 39 in the CoVLP+AS03 group (10,554 participants) developed COVID-19  $\geq 7$  days after  
373 receiving the second dose. The incidence rate in the placebo group was 0.179 per 1,000 person-  
374 years (95% CI: 0.150, 0.215) and was 0.052 in the CoVLP+AS03 group (95% CI: 0.038,  
375 0.071). This corresponds to an overall vaccine efficacy of 71.0% (95% CI: 58.7, 80.0, see  
376 Figure 2) irrespective of Day 0 serostatus. In the ITT set of 24,141 participants, 125 in the  
377 placebo group (12,067 participants) and 40 in the CoVLP+AS03 group (12,074 participants)  
378 developed COVID-19  $\geq 7$  days after receiving the second dose. This corresponds to a vaccine  
379 efficacy of 69.5% (95% CI: 56.7, 78.8; see Figure 2 for incidence rates). VE success for the

380 primary efficacy endpoint was defined as a  $\geq 50\%$  point estimate and a lower limit of the 95%  
381 CI  $> 30\%$ . These primary outcome criteria were met in both the ITT and PP sets.

382 As shown in Figure 3 for the PP set and in Supplementary Table S3 for the ITT set, VE of  
383 CoVLP+AS03 was also separately evaluated in healthy participants 18-64 years of age, healthy  
384 participants  $\geq 65$  years of age, and participants  $\geq 18$  years of age with significant comorbidities.  
385 The VE point estimates in the PP set were 70.9% (95% CI: 57.7, 80.4) and 76.8% (95% CI:  
386 21.5, 94.8) for healthy adults aged 64 or less and in adults with significant comorbidities,  
387 respectively, and 68.9% (95% CI: 55.0, 78.9) and 78.7% (95% CI: 30.2, 95.1) in these  
388 populations in the ITT, respectively irrespective of baseline (Day 0) serostatus. There were only  
389 two cases of COVID-19 in healthy older adults aged 65 or more, one in the placebo group and  
390 one in the CoVLP+AS03 group, precluding accurate assessment of VE in that population.

391 Vaccine efficacy in preventing moderate (*ad hoc* analysis) or severe disease was determined to  
392 be 78.1% (95% CI: 53.9, 90.5) in the PP population and 78.8% (95% CI: 55.8, 90.8) in the ITT  
393 set. Among subjects who were seronegative at Day 0, the overall VE against moderate-to-  
394 severe disease was 84.5% (95% CI: 62.0, 94.7) in the PP set and 86.0% (95% CI: 66.2, 95.1) in  
395 the ITT set. There were only 3 severe cases of COVID-19 in the 165 cases used for the PVE  
396 analysis (2 hospitalized) and all were in the placebo group. The VE point estimates were  
397 determined by gender, race, and baseline (Day 0) serostatus and are presented in Figure 3 (PP  
398 set) and in Supplementary Table S3 (ITT set).

399

#### 400 *Variant-Specific Efficacy*

401 Supplementary Figure 1 illustrates the incidence of COVID-19 by variant in the participating  
402 countries (colored bars, left Y-axis) as well as the number of participants with COVID-19  
403 contributing to the PVE analysis (red lines, right Y-axis). Up to the cut-off date of August 20<sup>th</sup>,  
404 2021, COVID-19 cases included in the PVE analysis were primarily identified in Argentina  
405 (n=59), Brazil (n=53), and the United States of America (n=47), and with much smaller  
406 numbers in the United Kingdom (n=4) and Canada (n=2).

407 Based on genomic sequences shared via GISAID, the global data science initiative<sup>48</sup>, the  
408 primary variants circulating during the study varied widely by country (see Supplemental  
409 Figure 1). The Delta and Gamma strains were the dominant strains in Argentina and Brazil with  
410 lesser contributions from Alpha and Lambda variants while Alpha and Delta variants



411 dominated in North America and the UK with lesser contribution from the Gamma variant in  
412 Canada and the USA.

413 Of the 157 cases included in the per protocol PVE analysis, sequence data are available for 114  
414 (72.6%) and a further 21 (13.4%) could not be sequenced due to very low viral copy numbers  
415 in the samples. All sequenced strains were either variants of concern (VoC) or variants of  
416 interest (VoI). No case included in the PVE analysis was caused by an ancestral (Wuhan) strain  
417 virus. The most frequently sequenced variants were Delta (50, 43.9%) and Gamma (52, 45.6%)  
418 with fewer numbers of Alpha (5, 4.4%), Mu (4, 3.5%) and Lambda (3, 2.6%) variants. There  
419 were no cases caused by Beta or Omicron variants among those infected.

420 As shown in Figure 4, for the PP set, overall vaccine efficacy point estimates were 75.3% (95%  
421 CI: 52.8, 87.9) and 88.6% (95% CI: 74.6, 95.6) for the dominant Delta and Gamma variants,  
422 respectively, and were 100% with much broader 95% confidence intervals for the small  
423 numbers of Alpha (95% CI: 28.0, -na-), Lambda (95% CI: -50.3, -na-), and Mu variants (95%  
424 CI: 2.3, -na-). The corresponding point estimates for the ITT set ranged from 74.0% and 87.8%  
425 for Delta and Gamma variants respectively to 100% for the other three variants (see  
426 Supplemental Table 3).

427 Sequencing success was markedly different between the CoVLP+AS03 (43.6%) and Placebo  
428 groups (82.0%) in the PP set (34.6% versus 83.2%, respectively in the ITT set). Analysis of  
429 viral loads at the time of diagnosis revealed a >100-fold difference overall between the  
430 CoVLP+AS03 and placebo cases ( $\log_{10}$  3.46 versus  $\log_{10}$  5.65 copies/mL, respectively; see  
431 Figure 5). Among the PP set, cases for which sequencing failed [i.e.: PCR-positive but  
432 Sequence-negative (PCR<sup>+</sup>/Seq<sup>-</sup>)], 14 were in the CoVLP+AS03 group and 7 were in the  
433 placebo group. For these PCR<sup>+</sup>/Seq<sup>-</sup> cases, the median viral load was at or below the limit of  
434 detection of the assay used (120 copies/mL) while the median viral load for the cases from  
435 which sequence information could be obtained was >500,000 copies/mL. Viral loads in the  
436 breakthrough Delta and Gamma cases were 42-fold and 269-fold lower in the CoVLP+AS03  
437 group compared to the placebo group ( $\log_{10}$  3.65 versus  $\log_{10}$  5.27 and  $\log_{10}$  3.78 versus  $\log_{10}$   
438 6.21, respectively; See Figure 5). A similar trend of markedly lower viral loads was observed in  
439 breakthrough cases classified as either mild ( $\log_{10}$  3.56 versus  $\log_{10}$  5.70 or 138-fold) or  
440 moderate ( $\log_{10}$  2.85 versus  $\log_{10}$  5.48 or 426-fold) in the CoVLP+AS03 and placebo groups,  
441 respectively.

442



443 *Tolerability and Safety*

444 Solicited AEs up to 7 days after first or second injection for both CoVLP+AS03 and placebo  
445 recipients were collected and analyzed for 7,819 participants (4,136 CoVLP+AS03 recipients  
446 and 3,683 placebo recipients) and are shown in Figure 6. Overall, both solicited local and  
447 systemic AEs were predominantly mild to moderate in intensity and transient in nature, lasting  
448 1-3 days on average.

449 As shown in Supplementary Table S4, more participants who received the CoVLP+AS03  
450 (3,819; 92.3%) than those who received placebo (1,677; 45.5 %) reported local solicited AEs  
451 after receiving first and/or second treatment; driven largely by pain at injection site. None of the  
452 solicited local AEs were potentially life-threatening (Grade 4). The incidence of Grade 2 and  
453 Grade 3 local AEs was higher after the second vaccination. Severe (Grade 3) solicited local  
454 AEs were reported by 33 (0.8%) and 85 (2.1%) after the first and second injections respectively  
455 among those who received CoVLP+AS03, and 2 (<0.1%) and 1 (<0.1%) respectively among  
456 the participants who received placebo.

457 As shown in Supplementary Table S5, similar to local solicited AEs, solicited systemic AEs  
458 were also more common in the participants who received CoVLP+AS03 (3,612; 87.3%)  
459 compared to those who received placebo (2,394; 65.0%) after receiving first and/or second  
460 treatment. Both the frequencies and intensities of these events increased after the second dose  
461 compared to the first (Supplementary Table S5). The more common systemic AEs in both  
462 groups were headache, fatigue, myalgia, and a general feeling of discomfort. Fever was  
463 reported in 1.1% after the first dose and was reported by 8.6% after the second dose in  
464 CoVLP+AS03 recipients. There were 42 participants (1.0%) with Grade 3 solicited systemic  
465 AEs after the first injection and 129 (3.1%) after the second injection in the CoVLP+AS03  
466 group, and 24 (0.7%) and 20 (0.5%) in the placebo group after the first and second injections  
467 respectively. Three participants reported Grade 4 systemic solicited AEs, 2 (<0.1%) in the  
468 CoVLP+AS03 group and 1 (<0.1%) in the placebo group; all occurred after the second  
469 injection.

470 For the analysis of the unsolicited AEs, safety data available from all participants in the SAS  
471 were included. The study measured the occurrence, intensity, and relationship of unsolicited  
472 AEs for 21 days after each dose, while SAEs, MAAEs, AEs leading to withdrawal, AESIs  
473 (including VAED/VAERD, anaphylaxis and severe allergic reactions, pIMDs), and deaths were  
474 monitored for 21 days after each dose (Supplementary Table S6) and then from day 43 to day

475 201 (Supplementary Table S7). The incidence of unsolicited AEs after receiving first and/or  
476 second treatment was slightly higher in CoVLP+AS03 recipients than in placebo recipients  
477 (22.7% vs 20.4% during the 21 days after vaccination, and 4.2% vs 4.0% during the 43 to 201  
478 days after vaccination). Unsolicited preferred term (PT) events with a frequency  $\geq 1\%$  after  
479 receiving first and/or second vaccination are presented in Supplementary Table S8.

480 The frequency of SAEs reported in subjects was similar between vaccine (24: 0.2%) and  
481 placebo recipients (16: 0.1%) up to 21 days after receiving first and/or second treatment.  
482 Between Day 43 and Day 201, SAEs were reported by 19 (0.2%) and 22 (0.2%) of the  
483 participants in the CoVLP+AS03 and placebo groups, respectively after receiving first and/or  
484 second treatment. No SAE was assessed as related to the investigational product in  
485 CoVLP+AS03 group and one subject in the placebo group reported 2 related SAEs (aortic  
486 thrombosis and peripheral artery thrombosis). No significant imbalance or safety concern was  
487 noted in MAAEs, AESIs, AEs leading to withdrawal, deaths, or specific AEs reported after  
488 vaccination with currently authorized vaccines (Bell's palsy, myocarditis, thrombotic events,  
489 etc. <sup>49</sup>; see Supplemental Table S9). There were no deaths related to the vaccine in the study.

490 **Discussion**

491 Despite the challenges of conducting a Phase 3, placebo-controlled vaccine efficacy study in  
492 the face of international vaccination roll-out campaigns and rapid viral evolution,  
493 CoVLP+AS03 met the primary efficacy endpoint of the study. Two doses of CoVLP+AS03  
494 delivered 21 days apart provide substantial protection against symptomatic COVID-19 caused  
495 by a range of SARS-CoV-2 variants including Alpha, Delta, Gamma, Lambda, and Mu.

496 The vaccine provided >70% protection against symptomatic COVID-19 of any severity in a  
497 diverse adult population including those with high-risk comorbidities irrespective of baseline  
498 serostatus. While vaccine efficacy in healthy adults over the age of 65 could not be determined  
499 due to ethical considerations that limited the number of older adults in the study, two doses of  
500 CoVLP+AS03 were previously shown to induce a neutralizing antibody response in healthy  
501 older adults that is indistinguishable from that seen in healthy adults<sup>41</sup>, suggesting that  
502 CoVLP+AS03 may provide comparable protection across the adult age range.

503 Prevention of severe disease and hospitalization, both to improve health outcomes and to  
504 alleviate health care resource constraints, remains a critical objective of national vaccination  
505 campaigns. While there were only two PP cases of severe disease in the trial and three in the  
506 ITT set (two of which required hospitalization), all were in the placebo group. Furthermore, in  
507 an *ad hoc* analysis, overall vaccine efficacy against combined moderate-severe disease was  
508 78.1%. Since the concentration of virus in the upper respiratory tract is a major determinant of  
509 sequencing success, the fact that the infecting strain could be identified in only 43.6% of the  
510 CoVLP+AS03 cases compared to 82% of the Placebo cases suggested that the viral loads in the  
511 PCR+Seq<sup>-</sup> ‘breakthrough’ cases in the vaccinated group would be low and that these cases  
512 would be mild, both of which proved to be true. Although completely asymptomatic individuals  
513 can have high viral loads in their upper respiratory tracts and there are conflicting data on the  
514 relationship between viral load at diagnosis and disease progression/severity, many groups  
515 have demonstrated that viral load in the upper respiratory tract can be a predictor of disease  
516 severity in COVID-19 patients<sup>50-53</sup>. All of the PCR+Seq<sup>-</sup> cases in current study were  
517 adjudicated to be mild and interestingly, the viral loads in these cases in either group were at or  
518 near the limit of detection of the RT-qPCR assay used ( $\log_{10}$  2.08 copies/mL) with a mean value  
519 ~3715x lower than the PCR+Seq<sup>+</sup> cases in the placebo group ( $\log_{10}$  5.65 copies/mL: Figure 5).  
520 These observations suggest that the overall VE point estimate for CoVLP+AS03 was, at least to  
521 some extent, drawn down by mild, PCR+Seq<sup>-</sup> breakthrough cases with very low viral loads.  
522 Indeed, the VE point estimate for the very mild, PCR+Seq<sup>-</sup> cases was -75.3% (95% CI: -364.0,  
19

523 28.6) which explains the difference between the overall VE estimate (71%) and both the strain-  
524 specific estimates (75.3-100%) and the estimate for the prevention of moderate or severe  
525 disease (78.1%). A large real-world evidence (RWE) study in the UK recently demonstrated the  
526 dilutive effect of low viral load cases on VE estimates for both mRNA and Adenovirus-  
527 vectored vaccines<sup>54</sup>. During the period when the Delta variant predominated, for example, the  
528 efficacy of an mRNA vaccine for high viral load disease was 86% (Ct values <30) but fell to  
529 71% for low viral load illness (Ct values ≥30). A unique feature of the current study, which  
530 helped identify cases as quickly as possible in the rapidly evolving pandemic, was the use of a  
531 single COVID-19-compatible symptom to trigger PCR testing. While this undoubtedly led to  
532 faster case accrual, it is likely that the use of a single symptom trigger may have led to the  
533 inclusion of a disproportionate number of very mild cases, and consequently to an  
534 underestimation of overall PVE relative to studies that used more restrictive clinical criteria to  
535 trigger swab collection.

536 Analysis of viral load over time after diagnosis was included in this study as a secondary  
537 outcome to look at the impact of vaccination on the magnitude and duration of viral shedding.  
538 However, an initial observation of a 2-fold difference in sequencing success between the  
539 CoVLP+AS03 and placebo cases suggested there might be important differences in the viral  
540 load at diagnosis and prompted an immediate analysis of these results. To our knowledge, this  
541 is the first Phase 3 RCT that has considered viral load as a parameter in the characterization of  
542 cases. This analysis in different subgroups revealed that breakthrough PCR<sup>+</sup>/Seq<sup>-</sup> cases in the  
543 CoVLP+AS03 group had between 42- and 420-fold less virus in the nasal passages at the time  
544 of diagnosis compared to the placebo group. Although this represents only a single time-point  
545 in the evolution of each case, follow-up swabs were collected every other day from these  
546 subjects while symptoms persisted to address one of the study's secondary outcomes (i.e.:  
547 duration and magnitude of viral shedding). Analysis of these swabs is underway but, given the  
548 striking initial differences in viral load at the time of diagnosis, consistent with recent analysis  
549 examining viral load in Adenoviral vector- and mRNA- vaccinated individuals<sup>55</sup>, it seems  
550 likely that vaccination with CoVLP+AS03 had significant virologic impact in the breakthrough  
551 cases with possible implications for both disease severity and reduced transmission.

552 While the recently-emerged Omicron variant threatens to spread rapidly, the dominant variants  
553 at the time this study was conducted were Alpha and Delta in North America and the UK, and  
554 Gamma and Delta in South America (Supplementary Figure 1) with lesser contributions from  
555 Lambda and Mu variants. Like all other currently deployed vaccines, CoVLP+AS03 was

556 designed to target the ancestral (Wuhan) strain of SARS-CoV-2 but not a single case of  
557 COVID-19 caused by this strain was identified in the current study. This trial, along with  
558 Clover’s recently announced global study and Novavax’s regional studies, are among the first  
559 Phase 3 RCTs to be confronted by a variant-dominant environment <sup>17,56</sup>. Although vaccines  
560 developed during the first waves of the pandemic reported vaccine efficacies as high as 95%  
561 <sup>7,57</sup>, the more recent RCTs and RWE studies performed during successive variant-dominated  
562 periods have consistently demonstrated that overall vaccine efficacy is substantially reduced  
563 compared to the Wuhan-era, although efficacy against the most severe forms of COVID-19 has  
564 generally been preserved. A recent meta-analysis of vaccine efficacy against the Delta variant  
565 by platform <sup>14</sup> suggested performance of 59% (95% CI: 26.1, 100) for inactivated vaccines,  
566 67.7% (95% CI: 62.3, 72.5) for Adenovirus-vector vaccines, and 77.7% (95% CI: 68.22, 88.59)  
567 for mRNA-based vaccines, possibly attributable to increased viral replication and  
568 transmissibility of this variant, as well as immune-evasive mutations in the spike protein <sup>13</sup>.  
569 Although the results from RCTs and RWE studies should only be compared with caution and  
570 most RWE studies are influenced by both strain and time post-vaccination <sup>15,58</sup>, the context in  
571 which vaccines are currently ‘asked to perform’ has clearly changed and the overall VE for  
572 CoVLP+AS03 of 71% (84.5% in baseline seronegative individuals) with strain-specific VE  
573 ranging from 75.3-100% seen in the current study appears to compare favorably to the currently  
574 reported effectiveness of other candidates and deployed vaccines <sup>13-15,17,56,59</sup>. This is particularly  
575 true since CoVLP+AS03 was challenged in this study by a range of strains with known  
576 immune-evasive mutations, including Delta, Gamma and Mu variants <sup>60,61</sup>. The challenges  
577 faced by CoVLP+AS03 in the on-going Phase 3 study continue with the rapid emergence of the  
578 Omicron variant. Active surveillance for cases will continue until the trial is terminated per-  
579 Protocol when the placebo recipients are offered vaccination or release from their study  
580 commitments and VE of CoVLP+AS03 against this most recent VoC will be calculated.

581 Overall, CoVLP+AS03 was well-tolerated and the safety profile in the Phase 3 portion of the  
582 Phase 2/3 study largely confirmed observations of the smaller Phase 1 study <sup>42</sup> and the Phase 2  
583 portion <sup>41</sup>. Most vaccine recipients reported at least one local or systemic adverse event, the  
584 large majority of these events were Grade 1-2 and transient and consistent with past reports of  
585 AS03-adjuvanted influenza vaccines <sup>40</sup>. The safety profile was generally comparable to recently  
586 reported solicited and unsolicited safety data for other deployed and candidate SARS-CoV-2  
587 vaccines <sup>7,57,62,63</sup>. Although 41.8% of participants reported mild-to-moderate and transient chills  
588 after the second dose, a documented fever was largely absent after the first dose and only

589 reported by 8.6% of the participants after the second dose. As generally observed for COVID-  
590 19 vaccines <sup>7,57,62,63</sup>, there was an increase in both the frequency and severity of solicited AEs  
591 after the second dose compared to the first dose. No safety concerns related to vaccination  
592 identified during the study up to the safety data cut-off date of October 25<sup>th</sup>, 2021. Although the  
593 number of participants exposed to the CoVLP+AS03 in the clinical development to date  
594 remains relatively small (~13,000 in the Phase 1, 2 and 3 studies) with a relatively short period  
595 of follow-up post vaccination, it is nonetheless reassuring that there has been no suggestion of  
596 VAED in either a large primate challenge study <sup>64</sup> or in the clinical trials <sup>41,42</sup>. There were no  
597 episodes of anaphylaxis or severe allergic reactions reported in the study. It is also reassuring  
598 that no imbalance of myocarditis or thrombotic events was observed, and all reported SAEs  
599 were considered unrelated to CoVLP+AS03 by the investigators.

600 Although the past 24 months have witnessed an unprecedented growth in vaccine science with  
601 the introduction and large-scale deployment of several SARS-CoV-2 vaccines produced using  
602 new platforms, this remarkable period of vaccine innovation has not yet run its course. If  
603 CoVLP+AS03 is licensed, it will be the first plant-based vaccine approved for human use and  
604 one of only a small number of plant-produced biopharmaceuticals <sup>65</sup>. It may also be the first  
605 VLP vaccine for SARS-CoV-2, bringing the potential advantages of this vaccine technology to  
606 the fight against COVID-19 <sup>24</sup>. The plant-based manufacturing platform has a number of  
607 natural advantages since it can theoretically be introduced across a wide range of scales from a  
608 modular, country-sized unit to a global manufacturing facility. Although the downstream  
609 processing and purification procedures are similar across all recombinant protein vaccine  
610 platforms, the upstream processes for plant-produced vaccines are based on sunlight and tightly  
611 controlled water and growth substrate to support the living plant ‘bioreactor’. As a result, this  
612 platform has the potential to promote distributive vaccine (and other biopharmaceutical)  
613 production rather than the current highly centralized production model that has contributed to  
614 the striking imbalances in the global distribution of SARS-CoV-2 vaccines <sup>66-68</sup>. Like other  
615 VLP vaccines, CoVLP is stable at refrigerator temperatures (2-8°C), making it easier to use in  
616 small and remote communities in resource-rich countries as well as in low- and middle-income  
617 countries than several of the currently deployed vaccines <sup>66</sup>. Although much attention has been  
618 devoted to the ‘new’ vaccine platforms like the mRNA and Adenovirus-vectored vaccines,  
619 there is still clearly a place in the fight against SARS-CoV-2 for more traditional inactivated  
620 virion and protein+adjuvant vaccines <sup>69</sup>. In particular, protein+adjuvant vaccines may be  
621 attractive to those who want to be vaccinated but have objecting beliefs or concerns regarding

622 platforms associated with currently available vaccines <sup>23</sup>. Protein+adjuvant vaccines may also  
623 play an important role as an option to boost the responses initiated by other primary vaccination  
624 strategies <sup>59,70</sup>.

625 Like any Phase 3 study done under pandemic conditions, the current trial had limitations, the  
626 most obvious of which are the limited number of older adults and smaller proportion of adults  
627 with comorbidities who were able to participate due to on-going vaccine roll-out programs and  
628 the relatively short period of follow-up due to the event-driven design. However,  
629 immunogenicity data from the Phase 2 portion of the current study demonstrated strong  
630 neutralizing antibody and cellular responses in all three study populations after two doses of  
631 CoVLP+AS03 <sup>41</sup>, and 6-month follow-up of CoVLP+AS03 recipients in the preceding Phase 1  
632 study demonstrated that both humoral and cellular responses were durable <sup>71</sup>. Although  
633 relatively few severe cases (three in the ITT set and two in the PP set) and two hospitalizations  
634 occurred in this study, all fell into the placebo arm and the overall efficacy against moderate  
635 and severe disease combined was 78.1% and 78.8% in the ITT and PP sets, respectively,  
636 suggesting that protection against the more severe manifestations of COVID-19 caused by a  
637 range of variants was substantial. This study is still ongoing, and a wide range of secondary  
638 outcomes will be reported as the data become available.

639 The primary vaccine efficacy and safety data presented here demonstrate that substantial  
640 protection against a range of VoC can be provided by two doses of CoVLP+AS03. New cases  
641 continue to be identified in the ongoing Phase 3 study and the efficacy of this new candidate  
642 vaccine against the recently-emerged Omicron variant will be determined in the coming  
643 months. Overall, the vaccine was generally well-tolerated and no safety signals were detected  
644 during the study. Once approved by regulators, this more traditional protein+adjuvant vaccine  
645 produced using the novel plant-based platform may be able to make an important contribution  
646 to the global struggle against the increasingly complex family of SARS-CoV-2 viruses.



647 **Author Contributions**

648 All authors contributed significantly to the submitted work. KJH, GH, AIM, AM, JA, JN, ST,  
649 MAD, YK, BJW contributed to all aspects of the clinical study from conception to completion.  
650 PG, SP, KB, LD, SL, PS, IB, AL, JP, JJW, EP, LT, ASE, LHM contributed to design and  
651 execution of the study as well as analysis and presentation of the data. GPM, RSD, EV, FR,  
652 RGW, GW, HA, CJ, TB, MAC, MK, FR, FPP contributed to design and oversight of the  
653 conduct of the study. All authors contributed to critical review of the data and the writing of the  
654 manuscript. All Medicago authors had full access to the data. YK, MAD, BJW made the final  
655 decision to submit the manuscript.

656

657 **Acknowledgements**

658 The authors acknowledge all the volunteers who participated in the study as well as the site  
659 investigators and their staff for conducting the studies with a high degree of professionalism.  
660 The authors also wish to acknowledge all the employees and contractors of Medicago and GSK  
661 who supported the study, directly or indirectly. With regard to supplementary Figure 1, we  
662 gratefully acknowledge all data contributors (the authors, their originating laboratories  
663 responsible for obtaining the specimens, and the submitting laboratories) for generating the  
664 genetic sequence and metadata and sharing it via the GISAID Initiative, on which this figure is  
665 based.

666

667 **Funding Statement**

668 The study was sponsored by Medicago Inc.

669

670 **Data Availability**

671 Medicago Inc. is committed to providing access to anonymized data collected during the trial  
672 that underlie the results reported in this article, at the end of the clinical trial, which is currently  
673 scheduled to be 1 year after the last participant is enrolled, unless granted an extension.  
674 Medicago Inc. will collaborate with its partner (GlaxoSmithKline, Wavre, Belgium) on such  
675 requests before disclosure. Proposals should be directed to wardb@medicago.com or  
676 daoustma@medicago.com. To gain access, data requestors will need to sign a data access  
677 agreement and access will be granted for non-commercial research purposes only.



678

679 **Conflict of Interest**

680 During the period of the study KJH, PG, GH, AIM, SP, KB, JA, IB, JD, NC, MC, JJW, NL,  
681 SL, AL, AM, EP, JP, PS, AS, LT, JN, MAD, ST, YK, BJW were either employees of  
682 Medicago Inc. or received salary support from Medicago Inc. TB, MAC, MK, FR are  
683 employed by the GlaxoSmithKline (GSK) group of companies and hold restricted shares in the  
684 group of companies. LHM received compensation from Medicago as a consultant.

685

686 **Figure Legends**

687 **Figure 1**

688 **Trial Profile – Participant Disposition**

689 Data cut-off for primary efficacy analysis occurred on August 20<sup>th</sup>, 2021. The intention-to-treat  
690 (ITT) population was comprised of participants in the randomized population who had no  
691 virologic evidence of COVID-19 prior to injection. The per-protocol (PP) population included  
692 participants who received two doses and had no major protocol deviations. The safety analysis  
693 set (SAS) included all participants who received at least one injection. For details on participant  
694 demographics, see Table 1.

695

696 **Figure 2**

697 **Cumulative Incidence of COVID-19 in CoVLP+AS03 Vaccinated and Placebo Control**  
698 **Study Participants**

699 Cumulative incidence of adjudicated COVID-19 events in the per protocol (a) and intention to  
700 treat (b) populations starting 7 days after the second vaccination. Red lines indicate placebo  
701 treatment and blue lines indicate CoVLP+AS03 treatment. Vaccine efficacy was calculated as  
702  $100 \times (1 - \text{incidence rate ratio})$  where the incidence rate ratio is defined as the ratio of person-  
703 years rate of COVID-19 cases in the CoVLP+AS03 group relative to the COVID-19 cases in  
704 the placebo group. Events (tick marks) are COVID-19 cases from PCR-positive  
705 nasopharyngeal swabs independently confirmed and adjudicated by an IDMC sub-committee.

706

707 **Figure 3**

708 **Subgroup Analysis of Vaccine Efficacy of CoVLP+AS03 to Prevent COVID-19**

709 Efficacy of CoVLP+AS03 vaccine in preventing COVID-19 in various subgroups within the  
710 per protocol population. Subgroup vaccine efficacy was calculated as  $100 \times (1 - \text{incidence rate}$   
711  $\text{ratio})$  where the incidence rate ratio is defined as the ratio of person-years rate of COVID-19  
712 cases in the CoVLP+AS03 group relative to the COVID-19 cases in the placebo for each  
713 subgroup analyzed. Yrs: years; 95% CI: 95% confidence interval; NA: not applicable

714

715

716 **Figure 4**

717 **Vaccine Efficacy by Variant**

718 Efficacy of CoVLP+AS03 vaccine in preventing COVID-19 by variant within the per protocol  
719 population. Vaccine efficacy by variant was calculated as  $100 \times (1 - \text{incidence rate ratio})$  where  
720 the incidence rate ratio is defined as the ratio of person-years rate of COVID-19 cases in the  
721 CoVLP+AS03 group relative to the COVID-19 cases in the placebo for each variant. Yrs:  
722 years; 95% CI: 95% confidence interval; NA: not applicable

723

724 **Figure 5**

725 **Viral load**

726 Mean viral loads, presented in log virus copies per mL, are provided for both placebo and  
727 CoVLP+AS03 recipients by subgroup. Numbers in parentheses indicate 1) the number of  
728 individuals in each group, and 2) standard deviation. To the right, symbols indicate mean log  
729 virus copy per mL (blue circles: CoVLP+AS03, green squares: placebo) and horizontal bars  
730 indicate standard deviation. P-values as determined by Wilcoxon rank-sum test indicate  
731 differences between the placebo and CoVLP+AS03 recipients by subgroup. All analysis is  
732 based on the intention to treat (ITT) population set. NE: not estimable.

733

734 **Figure 6**

735 **Solicited Local and Systemic AEs during the 7-Days After the First or Second Doses in**  
736 **both study groups (CoVLP+AS03 vs placebo)**

737 Participants were monitored for solicited local and systemic Adverse Events (AEs) from the  
738 time of vaccination through 7 days after vaccine administration. Participants who reported no  
739 AEs or for whom Serious Adverse Events (SAE) data are lacking make up the remainder of the  
740 100% calculation (not shown). For each category, AEs are classified as follows: Grade 1 =  
741 Mild; Grade 2 = Moderate; Grade 3 = Severe; Grade 4 = Potentially life threatening. If a  
742 participant had the same AE but with different grades, the highest grade was reported. If any of  
743 the solicited AEs persisted beyond Day 7 after vaccination, it was recorded as an unsolicited  
744 AE. Fever was defined as oral temperature  $\geq 38.0^\circ\text{C}$ .

745 **Figures**

746 **Figure 1 CONSORT Flow Diagram**

747

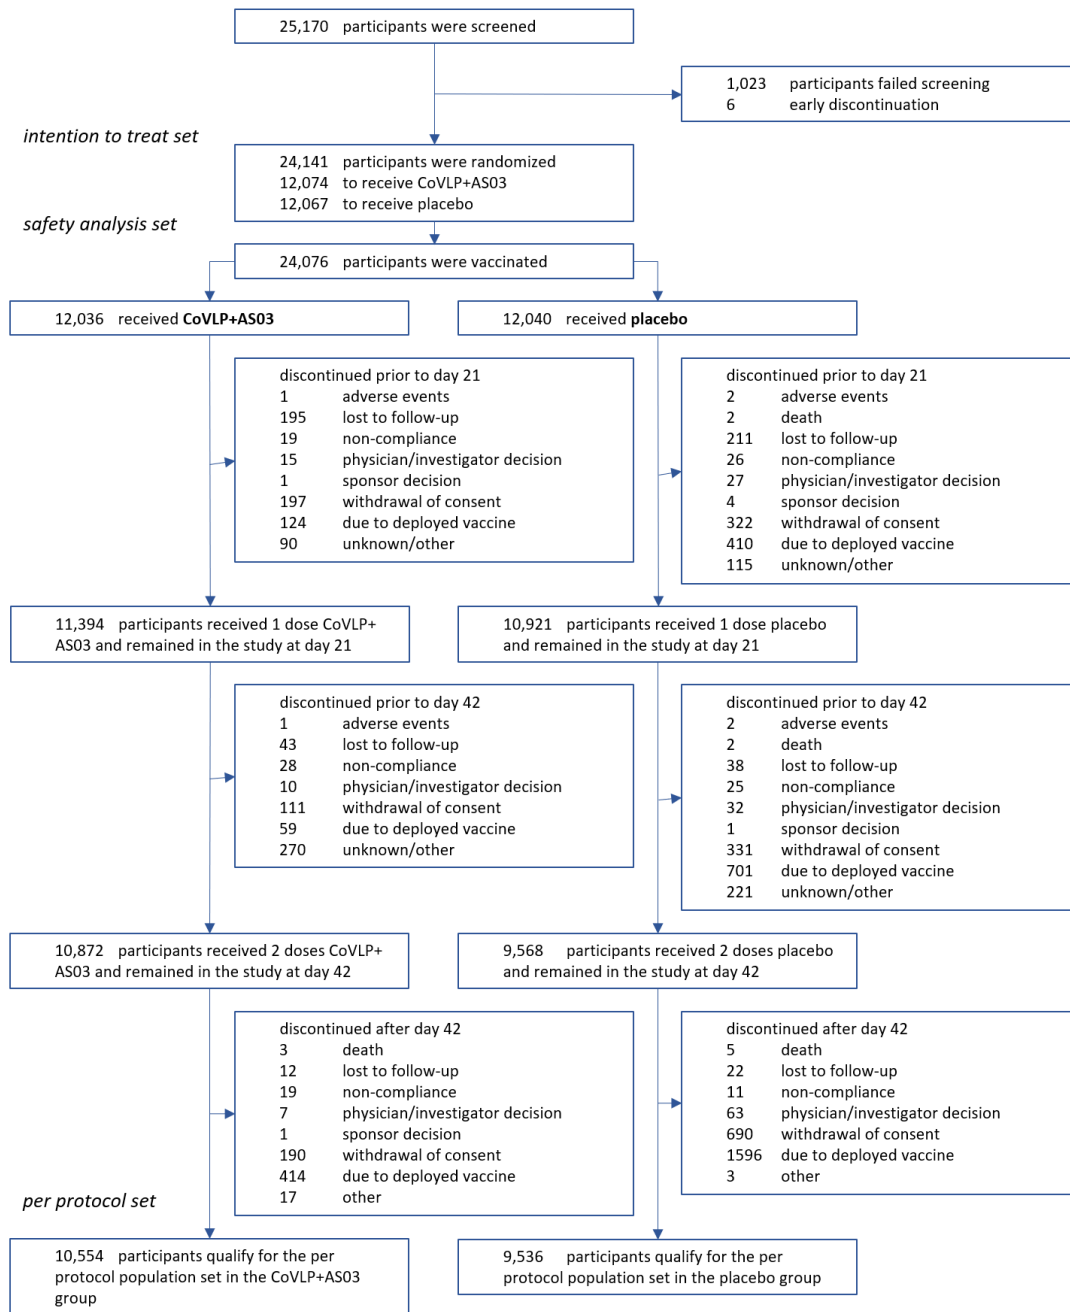

748

749 **Figure 2 Cumulative Incidence Curves from Seven Days Post Second Injection**

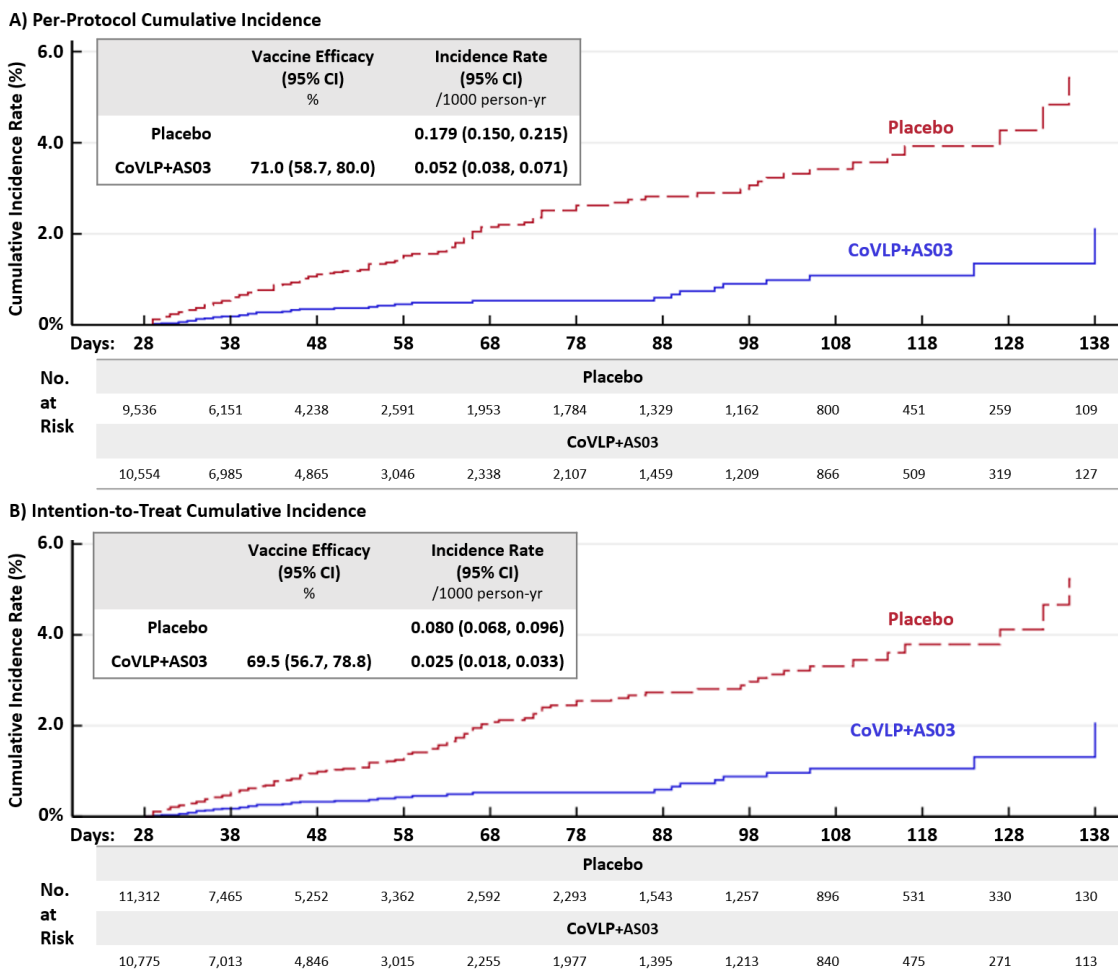

750

751 **Figure 3 Efficacy by Subgroup**

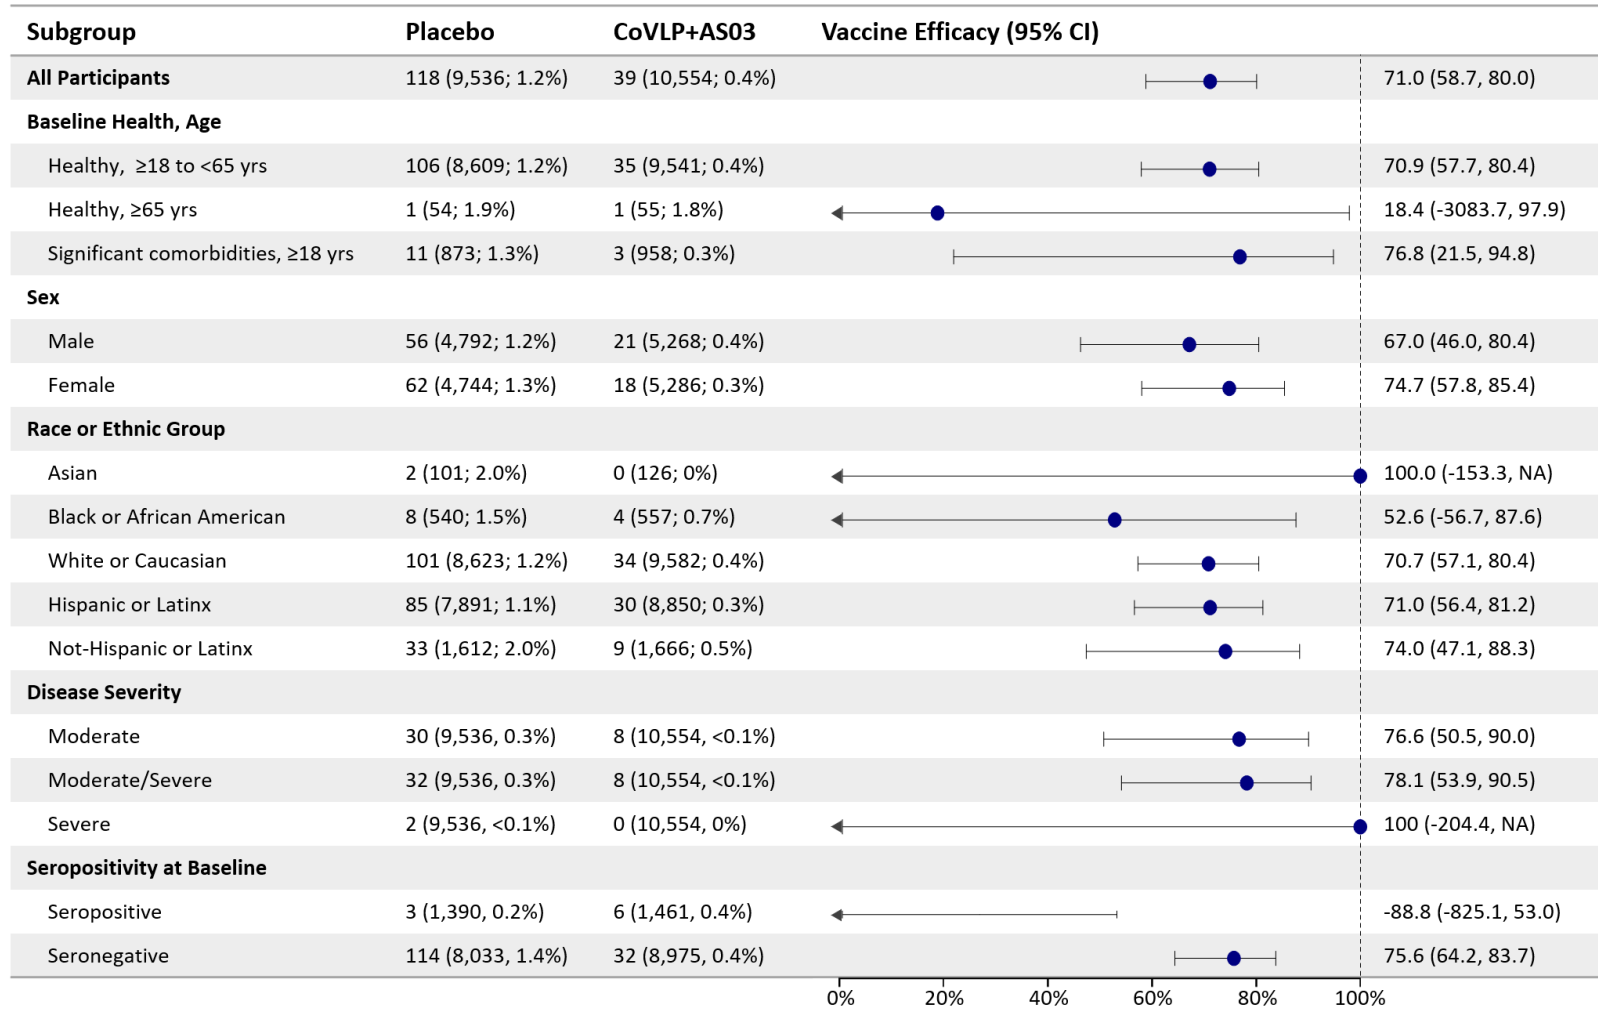

752

753 **Figure 4 Efficacy by Circulating Variant**

754

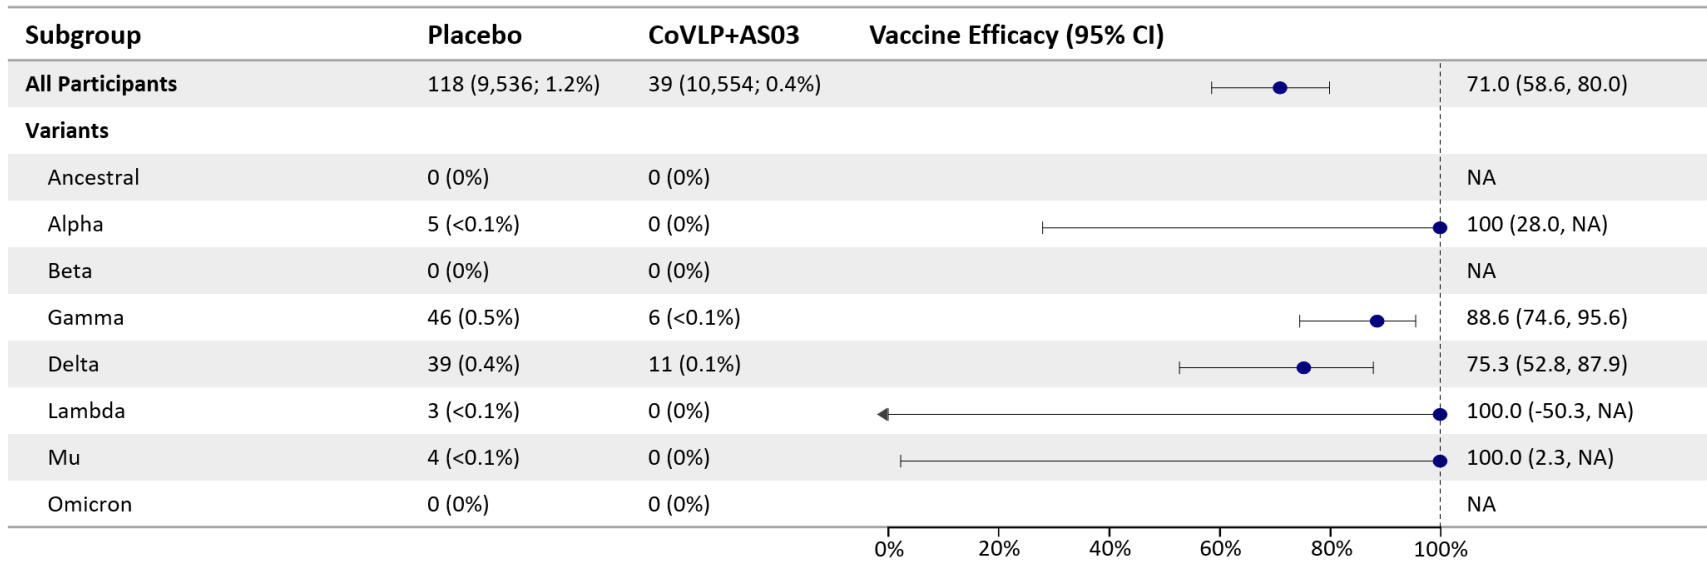

755

756 **Figure 5 Viral Load**

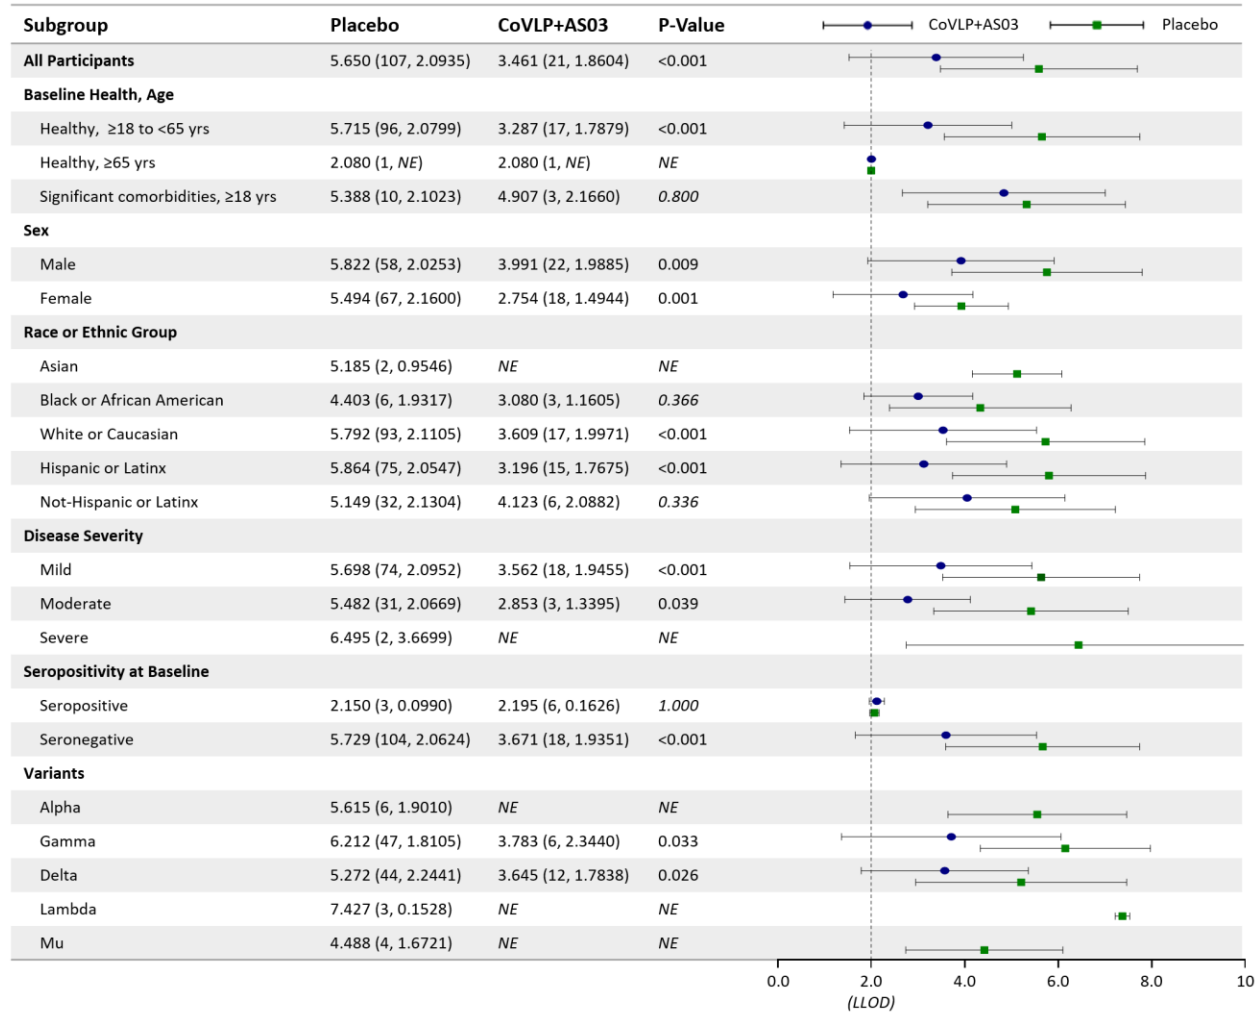

757



758 **Figure 6 Solicited Adverse Events**

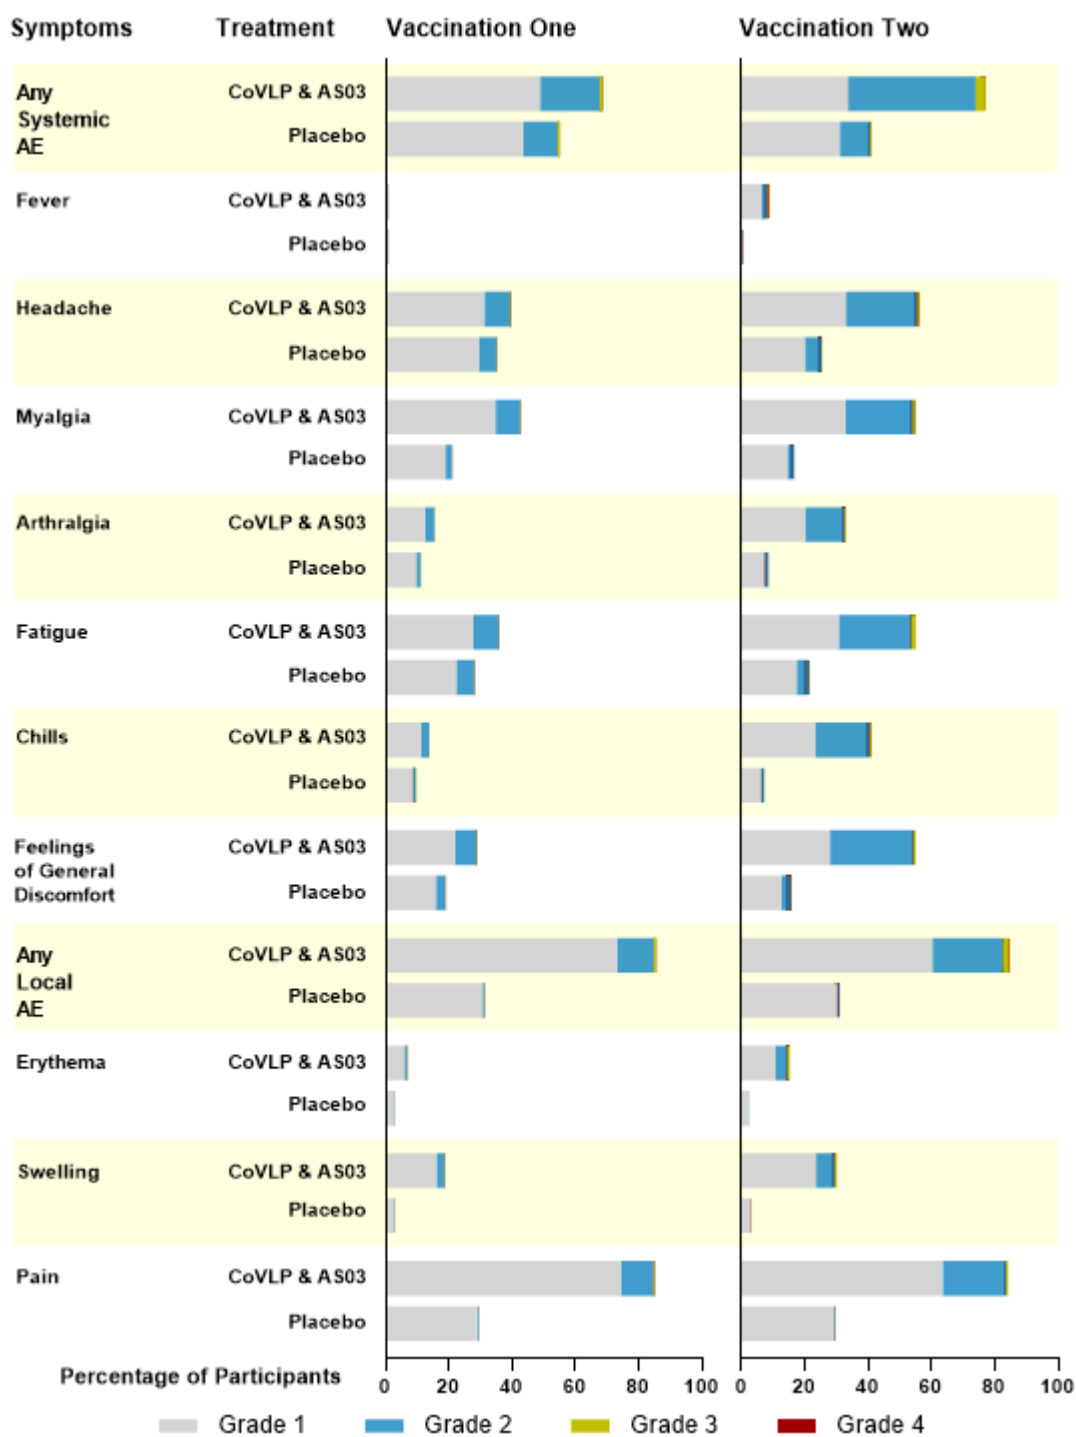

759

760 **Table 1: Summary of Demographics in the Per Protocol Set (NCT04636697)**

761 ‘N’ is the number of participants in a population, while ‘n’ represents the number of  
 762 participants in a category. Race and/or ethnic group were reported by the participants, who  
 763 could have listed more than one category. SD: Standard deviation; Min.: Minimum; Max.:  
 764 Maximum.

|                                           | Healthy Adults |              | Older Adults (65+) |             | Adults with Comorbidities |              | All Participants |              |
|-------------------------------------------|----------------|--------------|--------------------|-------------|---------------------------|--------------|------------------|--------------|
|                                           | CoVLP + AS03   | Placebo      | CoVLP + AS03       | Placebo     | CoVLP + AS03              | Placebo      | CoVLP + AS03     | Placebo      |
| <b>Participants (N)</b>                   | 9,541          | 8,609        | 55                 | 54          | 958                       | 873          | 10,554           | 9,536        |
| <b>Sex, n (%)</b>                         |                |              |                    |             |                           |              |                  |              |
| Male                                      | 4,764 (49.9)   | 4,324 (50.2) | 30 (54.5)          | 27 (50.0)   | 474 (49.5)                | 441 (50.5)   | 5,268 (49.9)     | 4,792 (50.3) |
| Female                                    | 4,777 (50.1)   | 4,285 (49.8) | 25 (45.5)          | 27 (50.0)   | 484 (50.5)                | 432 (49.5)   | 5,286 (50.1)     | 4,744 (49.7) |
| <b>Race, n (%)</b>                        |                |              |                    |             |                           |              |                  |              |
| American Indian/ Alaska Native            | 21 (0.2)       | 15 (0.2)     | 0                  | 0           | 1 (0.1)                   | 4 (0.5)      | 22 (0.2)         | 19 (0.2)     |
| Asian                                     | 116 (1.2)      | 94 (1.1)     | 1 (1.8)            | 0           | 9 (0.9)                   | 7 (0.8)      | 126 (1.2)        | 101 (1.1)    |
| Black/ African American                   | 449 (4.7)      | 434 (5.0)    | 7 (12.7)           | 9 (16.7)    | 101 (10.5)                | 97 (11.1)    | 557 (5.3)        | 540 (5.7)    |
| Multiple                                  | 177 (1.9)      | 183 (2.1)    | 1 (1.8)            | 0           | 22 (2.3)                  | 17 (1.9)     | 200 (1.9)        | 200 (2.1)    |
| Native Hawaiian or Other Pacific Islander | 19 (0.2)       | 14 (0.2)     | 0                  | 0           | 2 (0.2)                   | 4 (0.5)      | 21 (0.2)         | 18 (0.2)     |
| White or Caucasian                        | 8,720 (91.4)   | 7,835 (91.0) | 45 (81.8)          | 45 (83.3)   | 817 (85.3)                | 743 (85.1)   | 9,582 (90.8)     | 8,623 (90.4) |
| Other                                     | 1 (<0.1)       | 1 (<0.1)     | 0                  | 0           | 0                         | 0            | 1 (<0.1)         | 1 (<0.1)     |
| Not Reported                              | 35 (0.4)       | 29 (0.3)     | 0                  | 0           | 5 (0.5)                   | 1 (0.1)      | 40 (0.4)         | 30 (0.3)     |
| <b>Ethnicity, n (%)</b>                   |                |              |                    |             |                           |              |                  |              |
| Hispanic or Latinx                        | 8,076 (84.6)   | 7,171 (83.3) | 13 (23.6)          | 22 (40.7)   | 761 (79.4)                | 698 (80.0)   | 8,850 (83.9)     | 7,891 (82.7) |
| Not Hispanic or Latinx                    | 1,428 (15.0)   | 1,409 (16.4) | 42 (76.4)          | 32 (59.3)   | 196 (20.5)                | 171 (19.6)   | 1,666 (15.8)     | 1,612 (16.9) |
| Not Reported/ Specified                   | 37 (0.4)       | 29 (0.3)     | 0                  | 0           | 1 (0.1)                   | 4 (0.5)      | 38 (0.4)         | 33 (0.3)     |
| <b>Age at consent (years)</b>             |                |              |                    |             |                           |              |                  |              |
| Mean (SD)                                 | 31.8 (10.98)   | 31.9 (11.13) | 69.9 (4.30)        | 69.8 (5.09) | 38.7 (13.74)              | 40.2 (14.37) | 32.6 (11.72)     | 32.9 (12.01) |
| Median                                    | 29.0           | 29.0         | 69.0               | 68.0        | 37.0                      | 39.0         | 29.0             | 29.0         |
| Min, Max                                  | 18, 64         | 18, 64       | 65, 80             | 65, 86      | 18, 82                    | 18, 86       | 18, 82           | 18, 86       |

765  
 766

767 **References**

- 768 1. Zhou P, Yang X-L, Wang X-G, et al. A pneumonia outbreak associated with a new  
769 coronavirus of probable bat origin. *Nature* 2020;579:270-3.
- 770 2. WHO Coronavirus Disease (COVID-19) Dashboard. 2021. (Accessed January 12th,  
771 2022, at <https://covid19.who.int/>.)
- 772 3. Funk CD, Laferriere C, Ardakani A. Target Product Profile Analysis of COVID-19  
773 Vaccines in Phase III Clinical Trials and Beyond: An Early 2021 Perspective *Viruses* 2021;13.
- 774 4. Lan J, Ge J, Yu J, et al. Structure of the SARS-CoV-2 spike receptor-binding domain  
775 bound to the ACE2 receptor. *Nature* 2020;581:215-20.
- 776 5. Jackson CB, Farzan M, Chen B, Choe H. Mechanisms of SARS-CoV-2 entry into cells.  
777 *Nature Reviews Molecular Cell Biology* 2021.
- 778 6. Harvey WT, Carabelli AM, Jackson B, et al. SARS-CoV-2 variants, spike mutations  
779 and immune escape. *Nat Rev Microbiol* 2021;19:409-24.
- 780 7. Polack FP, Thomas SJ, Kitchin N, et al. Safety and Efficacy of the BNT162b2 mRNA  
781 Covid-19 Vaccine. *N Engl J Med* 2020;383:2603-15.
- 782 8. Moghadas SM, Vilches TN, Zhang K, et al. The impact of vaccination on COVID-19  
783 outbreaks in the United States. *medRxiv* 2021.
- 784 9. Subbarao K. The success of SARS-CoV-2 vaccines and challenges ahead. *Cell Host*  
785 *Microbe* 2021;29:1111-23.
- 786 10. Vashi AP, Coiado OC. The future of COVID-19: A vaccine review. *J Infect Public*  
787 *Health* 2021;14:1461-5.
- 788 11. Castiello T, Georgiopoulos G, Finocchiaro G, et al. COVID-19 and myocarditis: a  
789 systematic review and overview of current challenges. *Heart Fail Rev* 2021:1-11.
- 790 12. Greinacher A, Thiele T, Warkentin TE, Weisser K, Kyrle PA, Eichinger S. Thrombotic  
791 Thrombocytopenia after ChAdOx1 nCov-19 Vaccination. *N Engl J Med* 2021;384:2092-101.
- 792 13. Bian L, Gao Q, Gao F, et al. Impact of the Delta variant on vaccine efficacy and  
793 response strategies. *Expert Rev Vaccines* 2021;20:1201-9.
- 794 14. Cai C, Liu Y, Zeng S, Shen H, Han Y. The efficacy of COVID-19 vaccines against the  
795 B.1.617.2 (delta) variant. *Mol Ther* 2021;29:2890-2.
- 796 15. Fiolet T, Kherabi Y, MacDonald CJ, Ghosn J, Peiffer-Smadja N. Comparing COVID-  
797 19 vaccines for their characteristics, efficacy and effectiveness against SARS-CoV-2 and  
798 variants of concern: A narrative review. *Clin Microbiol Infect* 2021.
- 799 16. Goldberg Y, Mandel M, Bar-On YM, et al. Waning Immunity after the BNT162b2  
800 Vaccine in Israel. *N Engl J Med* 2021.
- 801 17. Shinde V, Bhikha S, Hoosain Z, et al. Efficacy of NVX-CoV2373 Covid-19 Vaccine  
802 against the B.1.351 Variant. *N Engl J Med* 2021;384:1899-909.
- 803 18. Pegu A, O'Connell SE, Schmidt SD, et al. Durability of mRNA-1273 vaccine-induced  
804 antibodies against SARS-CoV-2 variants. *Science* 2021;373:1372-7.
- 805 19. Thomas SJ, Moreira ED, Jr., Kitchin N, et al. Safety and Efficacy of the BNT162b2  
806 mRNA Covid-19 Vaccine through 6 Months. *N Engl J Med* 2021;385:1761-73.
- 807 20. Barda N, Dagan N, Cohen C, et al. Effectiveness of a third dose of the BNT162b2  
808 mRNA COVID-19 vaccine for preventing severe outcomes in Israel: an observational study.  
809 *Lancet* 2021.
- 810 21. Peacocke EF, Heupink LF, Frønsdal K, Dahl EH, Chola L. Global access to COVID-19  
811 vaccines: a scoping review of factors that may influence equitable access for low and middle-  
812 income countries. *BMJ Open* 2021;11:e049505.
- 813 22. Wouters OJ, Shadlen KC, Salcher-Konrad M, et al. Challenges in ensuring global  
814 access to COVID-19 vaccines: production, affordability, allocation, and deployment. *Lancet*  
815 2021;397:1023-34.

- 816 23. Aw J, Seng JJB, Seah SSY, Low LL. COVID-19 Vaccine Hesitancy-A Scoping  
817 Review of Literature in High-Income Countries. *Vaccines (Basel)* 2021;9.
- 818 24. Roldão A, Mellado MC, Castilho LR, Carrondo MJ, Alves PM. Virus-like particles in  
819 vaccine development. *Expert Rev Vaccines* 2010;9:1149-76.
- 820 25. Landry N, Ward BJ, Trépanier S, et al. Preclinical and clinical development of plant-  
821 made virus-like particle vaccine against avian H5N1 influenza. *PLoS One* 2010;5:e15559.
- 822 26. Pillet S, Aubin É, Trépanier S, et al. Humoral and cell-mediated immune responses to  
823 H5N1 plant-made virus-like particle vaccine are differentially impacted by alum and GLA-SE  
824 adjuvants in a Phase 2 clinical trial. *npj Vaccines* 2018;3:3.
- 825 27. Pillet S, Couillard J, Trépanier S, et al. Immunogenicity and safety of a quadrivalent  
826 plant-derived virus like particle influenza vaccine candidate—Two randomized Phase II clinical  
827 trials in 18 to 49 and  $\geq 50$  years old adults. *PLoS One* 2019;14:e0216533.
- 828 28. Pillet S, Racine T, Nfon C, et al. Plant-derived H7 VLP vaccine elicits protective  
829 immune response against H7N9 influenza virus in mice and ferrets. *Vaccine* 2015;33:6282-9.
- 830 29. Ward BJ, Makarkov A, Séguin A, et al. Efficacy, immunogenicity, and safety of a  
831 plant-derived, quadrivalent, virus-like particle influenza vaccine in adults (18-64 years) and  
832 older adults ( $\geq 65$  years): two multicentre, randomised phase 3 trials. *The Lancet* 2020.
- 833 30. D'Aoust MA, Couture MM, Charland N, et al. The production of hemagglutinin-based  
834 virus-like particles in plants: a rapid, efficient and safe response to pandemic influenza. *Plant*  
835 *Biotechnol J* 2010;8:607-19.
- 836 31. Morel S, Didierlaurent A, Bourguignon P, et al. Adjuvant System AS03 containing  $\alpha$ -  
837 tocopherol modulates innate immune response and leads to improved adaptive immunity.  
838 *Vaccine* 2011;29:2461-73.
- 839 32. Burny W, Callegaro A, Bechtold V, et al. Different Adjuvants Induce Common Innate  
840 Pathways That Are Associated with Enhanced Adaptive Responses against a Model Antigen in  
841 Humans. *Front Immunol* 2017;8:943.
- 842 33. De Mot L, Bechtold V, Bol V, et al. Transcriptional profiles of adjuvanted hepatitis B  
843 vaccines display variable interindividual homogeneity but a shared core signature. *Sci Transl*  
844 *Med* 2020;12.
- 845 34. Howard LM, Goll JB, Jensen TL, et al. AS03-Adjuvanted H5N1 Avian Influenza  
846 Vaccine Modulates Early Innate Immune Signatures in Human Peripheral Blood Mononuclear  
847 Cells. *J Infect Dis* 2019;219:1786-98.
- 848 35. Arunachalam PS, Walls AC, Golden N, et al. Adjuvanting a subunit COVID-19  
849 vaccine to induce protective immunity. *Nature* 2021;594:253-8.
- 850 36. Khurana S, Coyle EM, Manischewitz J, et al. AS03-adjuvanted H5N1 vaccine  
851 promotes antibody diversity and affinity maturation, NAI titers, cross-clade H5N1  
852 neutralization, but not H1N1 cross-subtype neutralization. *npj Vaccines* 2018;3:40.
- 853 37. Leroux-Roels I, Borkowski A, Vanwolleghe T, et al. Antigen sparing and cross-  
854 reactive immunity with an adjuvanted rH5N1 prototype pandemic influenza vaccine: a  
855 randomised controlled trial. *Lancet* 2007;370:580-9.
- 856 38. Moris P, van der Most R, Leroux-Roels I, et al. H5N1 influenza vaccine formulated  
857 with AS03 A induces strong cross-reactive and polyfunctional CD4 T-cell responses. *J Clin*  
858 *Immunol* 2011;31:443-54.
- 859 39. Budroni S, Buricchi F, Cavallone A, et al. Antibody avidity, persistence, and response  
860 to antigen recall: comparison of vaccine adjuvants. *npj Vaccines* 2021;6:78.
- 861 40. Cohet C, van der Most R, Bauchau V, et al. Safety of AS03-adjuvanted influenza  
862 vaccines: A review of the evidence. *Vaccine* 2019;37:3006-21.
- 863 41. Gobeil P, Pillet S, Séguin A, et al. Interim Report of a Phase 2 Randomized Trial of a  
864 Plant-Produced Virus-Like Particle Vaccine for Covid-19 in Healthy Adults Aged 18-64 and  
865 Older Adults Aged 65 and Older. *medRxiv* 2021:2021.05.14.21257248.

- 866 42. Ward BJ, Gobeil P, Séguin A, et al. Phase 1 randomized trial of a plant-derived virus-  
867 like particle vaccine for COVID-19. *Nature Medicine* 2021;27:1071-8.
- 868 43. Sette A, Crotty S. Adaptive immunity to SARS-CoV-2 and COVID-19. *Cell*  
869 2021;184:861-80.
- 870 44. Lu X, Wang L, Sakthivel SK, et al. US CDC Real-Time Reverse Transcription PCR  
871 Panel for Detection of Severe Acute Respiratory Syndrome Coronavirus 2. *CDC- Emerging*  
872 *Infectious Diseases* 2000;26.
- 873 45. FDA. Guidance for Industry: COVID-19: Developing Drugs and Biological Products  
874 for Treatment or Prevention. 2020.
- 875 46. Rothman KJ, Greenland S, TL L. Chapter 14. *Modern Epidemiology* 3rd ed.  
876 Philadelphia: Lippincott Williams & Wilkins; 2008.
- 877 47. Rosenberg ES, Dorabawila V, Easton D, et al. COVID-19 Vaccine Effectiveness by  
878 Product and Timing in New York State. *medRxiv* 2021:2021.10.08.21264595.
- 879 48. Khare S, Gurry C, Freitas L, et al. GISAID's Role in Pandemic Response. *China CDC*  
880 *Wkly* 2021;3:1049-51.
- 881 49. Center for Disease Control and Prevention: Reported Adverse Events. 2021. 2021, at  
882 <https://www.cdc.gov/coronavirus/2019-ncov/vaccines/safety/adverse-events.html>.)
- 883 50. de la Calle C, Lalueza A, Mancheño-Losa M, et al. Impact of viral load at admission on  
884 the development of respiratory failure in hospitalized patients with SARS-CoV-2 infection. *Eur*  
885 *J Clin Microbiol Infect Dis* 2021;40:1209-16.
- 886 51. El Zein S, Chehab O, Kanj A, et al. SARS-CoV-2 infection: Initial viral load (iVL)  
887 predicts severity of illness/outcome, and declining trend of iVL in hospitalized patients  
888 corresponds with slowing of the pandemic. *PLoS One* 2021;16:e0255981.
- 889 52. Kwon JS, Kim JY, Kim MC, et al. Factors of Severity in Patients with COVID-19:  
890 Cytokine/Chemokine Concentrations, Viral Load, and Antibody Responses. *Am J Trop Med*  
891 *Hyg* 2020;103:2412-8.
- 892 53. Wang Y, Zhang L, Sang L, et al. Kinetics of viral load and antibody response in  
893 relation to COVID-19 severity. *J Clin Invest* 2020;130:5235-44.
- 894 54. Pouwels KB, Pritchard E, Matthews PC, et al. Effect of Delta variant on viral burden  
895 and vaccine effectiveness against new SARS-CoV-2 infections in the UK. *Nat Med* 2021.
- 896 55. Eyre DW, Taylor D, Purver M, et al. Effect of Covid-19 Vaccination on Transmission  
897 of Alpha and Delta Variants. *N Engl J Med* 2022.
- 898 56. Clover BioPharmaceuticals. Clover's COVID-19 Vaccine Candidate Demonstrates  
899 79% Efficacy Against Delta in Global Phase 2/3 SPECTRA Trial Dominated by Variants of  
900 Concern and Interest. 2021.
- 901 57. Baden LR, El Sahly HM, Essink B, et al. Efficacy and Safety of the mRNA-1273  
902 SARS-CoV-2 Vaccine. *N Engl J Med* 2021;384:403-16.
- 903 58. Cromer D, Juno JA, Houry D, et al. Prospects for durable immune control of SARS-  
904 CoV-2 and prevention of reinfection. *Nature Reviews Immunology* 2021.
- 905 59. Liu Q, Qin C, Liu M, Liu J. Effectiveness and safety of SARS-CoV-2 vaccine in real-  
906 world studies: a systematic review and meta-analysis. *Infect Dis Poverty* 2021;10:132.
- 907 60. Gupta D, Sharma P, Singh M, Kumar M, Ethayathulla AS, Kaur P. Structural and  
908 functional insights into the spike protein mutations of emerging SARS-CoV-2 variants. *Cellular*  
909 *and Molecular Life Sciences* 2021;78:7967-89.
- 910 61. Pan T, Hu Z, Hu F, et al. Significantly reduced abilities to cross-neutralize SARS-CoV-  
911 2 variants by sera from convalescent COVID-19 patients infected by Delta or early strains.  
912 *Cellular & Molecular Immunology* 2021;18:2560-2.
- 913 62. Heath PT, Galiza EP, Baxter DN, et al. Safety and Efficacy of NVX-CoV2373 Covid-  
914 19 Vaccine. *N Engl J Med* 2021;385:1172-83.

- 915 63. Voysey M, Clemens SAC, Madhi SA, et al. Safety and efficacy of the ChAdOx1  
916 nCoV-19 vaccine (AZD1222) against SARS-CoV-2: an interim analysis of four randomised  
917 controlled trials in Brazil, South Africa, and the UK. *Lancet* 2021;397:99-111.
- 918 64. Pillet S, Arunachalam PS, Andreani G, et al. Safety, immunogenicity and protection  
919 provided by unadjuvanted and adjuvanted formulations of recombinant plant-derived virus-like  
920 particle vaccine candidate for COVID-19 in non-human primates. *bioRxiv*  
921 2021:2021.05.15.444262.
- 922 65. Lomonosoff GP, D'Aoust MA. Plant-produced biopharmaceuticals: A case of  
923 technical developments driving clinical deployment. *Science* 2016;353:1237-40.
- 924 66. AboulFotouh K, Cui Z, Williams RO, 3rd. Next-Generation COVID-19 Vaccines  
925 Should Take Efficiency of Distribution into Consideration. *AAPS PharmSciTech* 2021;22:126.
- 926 67. Adejumo OA, Adejumo OA. Recalling the universal health coverage vision and equity  
927 in the COVID-19 vaccine distribution plan. *Pan Afr Med J* 2021;39:197.
- 928 68. Pagliusi S, Jarrett S, Hayman B, et al. Emerging manufacturers engagements in the  
929 COVID -19 vaccine research, development and supply. *Vaccine* 2020;38:5418-23.
- 930 69. Hotez PJ, Bottazzi ME. Whole Inactivated Virus and Protein-Based COVID-19  
931 Vaccines. *Annu Rev Med* 2021.
- 932 70. Munro APS, Janani L, Cornelius V, et al. Safety and immunogenicity of seven  
933 COVID-19 vaccines as a third dose (booster) following two doses of ChAdOx1 nCov-19 or  
934 BNT162b2 in the UK (COV-BOOST): a blinded, multicentre, randomised, controlled, phase 2  
935 trial. *Lancet* 2021.
- 936 71. Gobeil P, Pillet S, Boulay I, et al. Durability and Cross-Reactivity of Immune  
937 Responses Induced by an AS03 Adjuvanted Plant-Based Recombinant Virus-Like Particle  
938 Vaccine for COVID-19. *medRxiv* 2021:2021.08.04.21261507.

939
