# Supplementary material for: Efficacy and Safety of a Plant-Based Virus-Like Particle Vaccine for COVID-19 Adjuvanted with AS03
Source: bioRxiv or medRxiv preprint supplement (doi:10.1101/2022.01.17.22269242), 2022-01-26
Supplement: Supplementary file [file media-1.pdf]

- 1 **Title: Efficacy and Safety of a Plant-Based Virus-Like Particle Vaccine for**
- 2 **COVID-19 Adjuvanted with AS03**
- 3
- 4 **Supplementary Appendix**

5 *List of investigators*

| Country   | Investigator                 | Institution                                                                             |
|-----------|------------------------------|-----------------------------------------------------------------------------------------|
| Argentina | Chirino Navarta, Daniel      | Mautalen Salud e Investigación (Expertia SA), Buenos Aires                              |
| Argentina | Llapur, Conrado              | Clinica Mayo de UMCB SRL, San Miguel de Tucumán                                         |
| Argentina | Maulen, Sergio               | Fundación FunDaMos, Buenos Aires                                                        |
| Argentina | Perez Marc, Gonzalo          | Hospital Militar Central Cirujano Mayor Dr. Cosme Argerich, Buenos Aires                |
| Argentina | Polack, Fernando             | Hospital Militar Central Cirujano Mayor Dr. Cosme Argerich, Buenos Aires                |
| Argentina | Riera, Fernando              | Sanatorio Allende, Cordoba                                                              |
| Brazil    | Diaz, Ricardo                | Azidus Brasil Pesquisa e Desenvolvimento Ltda, Valinhos, Sao Paulo                      |
| Brazil    | Ferrara, Luciana             | Azidus Brasil Pesquisa e Desenvolvimento Ltda, Valinhos, Sao Paulo                      |
| Brazil    | Freire, Antonio              | Santa Casa De Misericordia De Belo Horizonte, Belo Horizonte, Minas Gerais              |
| Brazil    | Hammes, Luciano              | Centro de Pesquisa Clinica - Hospital Moinhos de Vento, Porto Alegre, Rio Grande do Sul |
| Brazil    | Itinose, Kengi               | Unidade Hospital do Rocio, Campo Largo                                                  |
| Brazil    | Nogueira, Mauricio           | Fundação Faculdade Regional de Medicina de Sao Jose do Rio Preto, Sao Jose do Rio Preto |
| Brazil    | Vasconcellos, Eduardo Freire | Instituto de Pesquisas Clinicas L2IP, Brasilia, DF                                      |
| Brazil    | Wolff, Priscila Geller       | IBPClin Instituto Brasil de Pesquisa Clinica, Rio de Janeiro                            |
| Canada    | Abitbol, Alexander           | LMC Clinical Research Inc. (CPU), Toronto, Ontario                                      |
| Canada    | Aggarwal, Naresh             | Aggarwal and Associates Ltd, Brampton, Ontario                                          |
| Canada    | Badenhorst, Josias           | CARe Clinic, Red Deer, Alberta                                                          |
| Canada    | Dionne, Marc                 | CHU de Québec-Université Laval, Quebec City, Quebec                                     |
| Canada    | Frechette, Andre             | Diex Research Quebec Inc, Quebec City, Quebec                                           |
| Canada    | Gauthier, Jean Sebastien     | QT Research Sherbrooke, Sherbrooke, Quebec                                              |
| Canada    | Girard, Ginette              | Diex Research, Sherbrooke, Quebec                                                       |
| Canada    | Henein, Sam                  | SKDS Research Inc., Newmarket, Ontario                                                  |
| Canada    | Libman, Michael              | McGill University Health Centre Vaccine Study Centre, Pierrefonds, Quebec               |
| Canada    | Paquette, Jean-Sebastien     | Diex Recherche Joliette, Saint-Charles-                                                 |

| Country        | Investigator                    | Institution                                                                                                                                 |
|----------------|---------------------------------|---------------------------------------------------------------------------------------------------------------------------------------------|
| Canada         | Tellier, Guy                    | Borromée, Quebec<br>Manna Research Mirabel, Mirabel,<br>Quebec                                                                              |
| Canada         | Vale, Noah                      | Manna Research Toronto, Toronto,<br>Ontario                                                                                                 |
| Canada         | Vallieres, Gerald               | Manna Research Quebec, Lévis, Quebec                                                                                                        |
| Canada         | Wallace, Garry                  | Dawson Clinical Research Inc., Guelph,<br>Ontario                                                                                           |
| Mexico         | Castro Melchor, Liliana         | Investigación Biomédica para el<br>Desarrollo de Fármacos, S.A. de C.V.,<br>Zapopan                                                         |
| Mexico         | De los Rios Ibarra,<br>Manuel   | Centro para el Desarrollo de la Medicina<br>y de Asistencia Médica Especializada SC,<br>Culiacan                                            |
| Mexico         | Del Carpio, Luis                | Sociedad de Metabolismo y Corazon S.C<br>(SOMEKO), Veracruz                                                                                 |
| Mexico         | Guzman Romero, Ana<br>Karla     | RM Pharma Specialists S.A. de C.V.,<br>Ciudad de Mexico                                                                                     |
| Mexico         | Martinez Perez, Jose<br>Miguel  | Integra RGH Centro de Investigacion -<br>Clinica de Ozonoterapia RGH AC,<br>Puebla                                                          |
| Mexico         | Rios Mejia, Edmundo<br>Daniel   | Investigación Biomédica para el<br>Desarrollo de Fármacos, S.A. de C.V.,<br>Aguascalientes                                                  |
| Mexico         | Sanchez Campos, Efen<br>Alberto | Centro Multidisciplinario para el<br>Desarrollo Especializado de la<br>Investigación Clínica en Yucatan S.C.P.<br>(CEMDEICY S.C.P.), Merida |
| United Kingdom | Apoola, Ade                     | University Hospitals Derby and Burton,<br>Derby                                                                                             |
| United Kingdom | Galloway, James                 | Kings College Hospital, London                                                                                                              |
| United Kingdom | Healy, Brendan                  | Public Health Wales NHS Trust, Cardiff                                                                                                      |
| United Kingdom | Kyriakidou, Christina           | Synexus Midlands Clinical Research<br>Centre, Birmingham                                                                                    |
| United Kingdom | Lacey, Charles                  | University of York/York Teaching<br>Hospital, York                                                                                          |
| United Kingdom | Moore, Patrick                  | University Hospitals Dorset NHS<br>Foundation Trust, Bournemouth                                                                            |
| United Kingdom | Nicholls, Helen                 | Synexus Wales Clinical Research Centre<br>DRS, Cardiff                                                                                      |
| United Kingdom | Prestwell, Carol                | Synexus Lancashire Clinical Research<br>Centre DRS, Chorley                                                                                 |
| United Kingdom | Soiza, Roy                      | NHS Grampian, Aberdeen                                                                                                                      |
| United Kingdom | Viljoen, Marlies                | Synexus Manchester Clinical Research<br>Centre DRS, Manchester                                                                              |
| United Kingdom | Whittington, Ashley             | London North West University<br>Healthcare NHS Trust, Harrow                                                                                |
| United States  | Aazami, Hessam                  | Hope Clinical, Canoga Park, California                                                                                                      |

| Country       | Investigator       | Institution                                                                   |
|---------------|--------------------|-------------------------------------------------------------------------------|
| United States | Adelglass, Jeffrey | Research Your Health, Plano, Texas                                            |
| United States | Anderson, Duane    | Excel Clinical Research, Las Vegas, Nevada                                    |
| United States | Arora, Samir       | Aventiv Research Inc, Columbus, Ohio                                          |
| United States | Berger, Ira        | Meridian Clinical Research, Rockville, Maryland                               |
| United States | Bordon, Jose       | Ascension Providence Health System, Washington, DC                            |
| United States | Bradley, Paul      | Meridian Clinical Research, Savannah, Georgia                                 |
| United States | Carlson, Mark      | Be Well Clinical Studies, LLC, Lincoln, Nebraska                              |
| United States | Casey, Sherri      | Benchmark Research, Covington, Louisiana                                      |
| United States | Chu, Laurence      | Benchmark Research, Austin, Texas                                             |
| United States | DeFrancisco, Don   | Pharmacology Research Institute, Newport Beach, California                    |
| United States | Ebuh, Valentine    | Global Medical Research, Dallas, Texas                                        |
| United States | Ensz, David        | Meridian Clinical Research, Sioux City, Iowa                                  |
| United States | Essink, Brandon    | Meridian Clinical Research LLC, Omaha, Nebraska                               |
| United States | Fiel, Thomas       | Fiel Family & Sports Medicine/ CCT Research, Tempe, Arizona                   |
| United States | Forte, Dana        | Forte Family Practice/ CCT Research, Las Vegas, Nevada                        |
| United States | Fussell, Suzanne   | Long Beach Clinical Trial Services Inc, Long Beach, California                |
| United States | Gregerson, Gary    | ASR, LLC, Nampa, Idaho                                                        |
| United States | Haffizulla, Jason  | Precision Clinical Research, LLC, Sunrise, Florida                            |
| United States | Hassman, Michael   | Hassman Research Institute, Berlin, New Jersey                                |
| United States | Hemmersmeier, John | South Ogden Family Medicine/ CCT Research, Ogden, Utah                        |
| United States | Hong, Mathew       | M3 Wake Research, Inc, Raleigh, North Carolina                                |
| United States | Juvvadi, Nikhila   | Affinity Health, Chicago, Illinois                                            |
| United States | Latorre, Agustin   | AppleMed Research Inc, Miami, Florida                                         |
| United States | Martin, Earl       | DM Clinical Research/Martin Diagnostic Clinic, Tomball, Texas                 |
| United States | Oppong, Yaa        | Carolina Institute for Clinical Research, Fayetteville, North Carolina        |
| United States | Patel, Suchet      | Meridian Clinical Research, LLC, Endwell, New York                            |
| United States | Pickrell, Paul     | Tekton Research, Austin, Texas                                                |
| United States | Rosen, Jeffrey     | AMR Miami, formerly Clinical Research of South Florida, Coral Gables, Florida |

| Country       | Investigator     | Institution                                                                                                       |
|---------------|------------------|-------------------------------------------------------------------------------------------------------------------|
| United States | Rothenberg, Joan | Velocity Clinical Research, Cleveland, Ohio                                                                       |
| United States | Schwartz, Howard | Research Centers of America, Hollywood, Florida                                                                   |
| United States | Seger, William   | Benchmark Research, Fort Worth, Texas                                                                             |
| United States | Tarakjian, Denis | WR-MCCR, LLC, San Diego, California                                                                               |
| United States | Thakkar, Harish  | Mt. Olympus Medical Research LLC, Sugarland, Texas                                                                |
| United States | Vanderzyl, John  | Sugar Lakes Family Practice, PA - an Elligo Health Research Site, Sugarland, Texas                                |
| United States | Vrbicky, Keith   | Meridian Clinical Research LLC, Norfolk, Nebraska                                                                 |
| United States | Walters, Alton   | Las Vegas Clinical Trials, North Las Vegas, Nevada                                                                |
| United States | Williams, Barton | Trial Management Associates, LLC, Wilmington, North Carolina                                                      |
| United States | Williams, Hayes  | Achieve Clinical Research, LLC dba Accel Research Sites at Birmingham Clinical Research Unit, Birmingham, Alabama |
| United States | Wolf, Thomas     | Methodist Physicians Clinic / CCT Research, Fremont, Nebraska                                                     |
| United States | Zeig, Steven     | Elixia LLC, Palm Beach, Florida                                                                                   |

6 *Supplementary Methods (Viral Sequencing)*

7 Sequencing of viral genomes from swabs was performed by Viroclinics-DDL (Netherlands).  
8 Total nucleic acid (DNA/RNA) isolation was performed with the MagMAX™ Viral/Pathogen  
9 Nucleic Acid Isolation kit on the KingFisher™ Flex instrument (ThermoFisher) using 400 µL  
10 sample input. Nucleic acid elution was performed in 50 µL of elution buffer. Full-length  
11 amplification of the target RNA, i.e., RNA encoding SARS-CoV-2 S, was performed by  
12 amplifying 5 overlapping fragments of ~900 bp by nested RT-PCR using the primers sets from  
13 the CDC Singleplex PCR 38 amplicons protocol (PacBio). The outer one-step RT-PCR reaction  
14 was performed with the outer S-gene primer sets and the SuperScript™ III One-Step RT-PCR  
15 System with Platinum™ Taq High Fidelity DNA Polymerase (ThermoFisher) using 5 µL of the  
16 isolated RNA. The nested (inner) amplification step was performed with the inner primer sets  
17 and the Phusion Hot Start II High-Fidelity DNA Polymerase (ThermoFisher) or Q5® Hot Start  
18 High-Fidelity DNA Polymerase (NEB). Nested PCR products were analyzed by gel  
19 electrophoresis using standard molecular biology protocols, to confirm successful  
20 amplification.

21 Next-generation sequence (NGS) analysis of S-gene amplicons was performed using the MiSeq  
22 or NextSeq Illumina platforms. NGS analysis was performed on samples consisting of two  
23 pools of non-overlapping S-gene amplicons. To generate single datasets for reporting and  
24 interpretation, the FASTQ files of the two pools of non-overlapping fragments were pooled  
25 together *in silico*. After combining the two datasets, all data was mapped against the same  
26 reference sequence (SARS-CoV-2 Wuhan-Hu-1 GenBank: MN908947.3). Identifying the  
27 location on the reference genome allowed identification of reads that started or ended in or near  
28 a primer region (possibly containing primer ambiguity), in order to select them for the primer  
29 trimming algorithm. Sufficient nucleotides were trimmed off each read that was selected by this  
30 process and the remaining part of the read was considered non-primer derived. For *in silico*  
31 pooling and primer trimming, all primer locations were implemented in DDL's bioinformatics  
32 ATHENA pipeline. The deep sequencing process comprised: quantification of S-gene amplicon  
33 pools by PicoGreen or Qubit™; fragment dilutions and equimolar mixing to normalize the  
34 concentrations of each of the amplicon pools; library preparation with the Nextera XT System  
35 (Illumina); sequence reactions with 300-cycle kit (150 bp bidirectional reads) on the Illumina  
36 Miseq or with a 300-cycle mid output kit on the Illumina Nextseq; Data QC and Data reporting.

37

38 *Supplementary Figure 1 | Circulating Variants During Course of Clinical Trial*  
39 Each panel illustrates the variants circulating in time relative to the accrual of COVID-19  
40 events for each nation in which the trial took place. Individual vertical columns indicate the  
41 incidence rate of variants reported to GISAID during a seven-day period relative to the total  
42 number of sequences reported for the period. Individual colors within the stacked columns  
43 represent variants in circulation as a percentage of total, shown on the left Y axis. In cases  
44 where sequence identity was not reported or does not refer to a Variant of Concern (VoC) or  
45 Variant of Interest (VoI), the incidence was reported as undefined. Red lines indicate the  
46 number of total adjudicated COVID-19 events contributing to the calculation of primary  
47 vaccine efficacy accrued in each nation through time quantified relative to the right Y-axis. No  
48 COVID-19 events accrued in Mexico. Dotted vertical lines indicate the date of first injection of  
49 a participant by country. FPI: First Patient In.

50

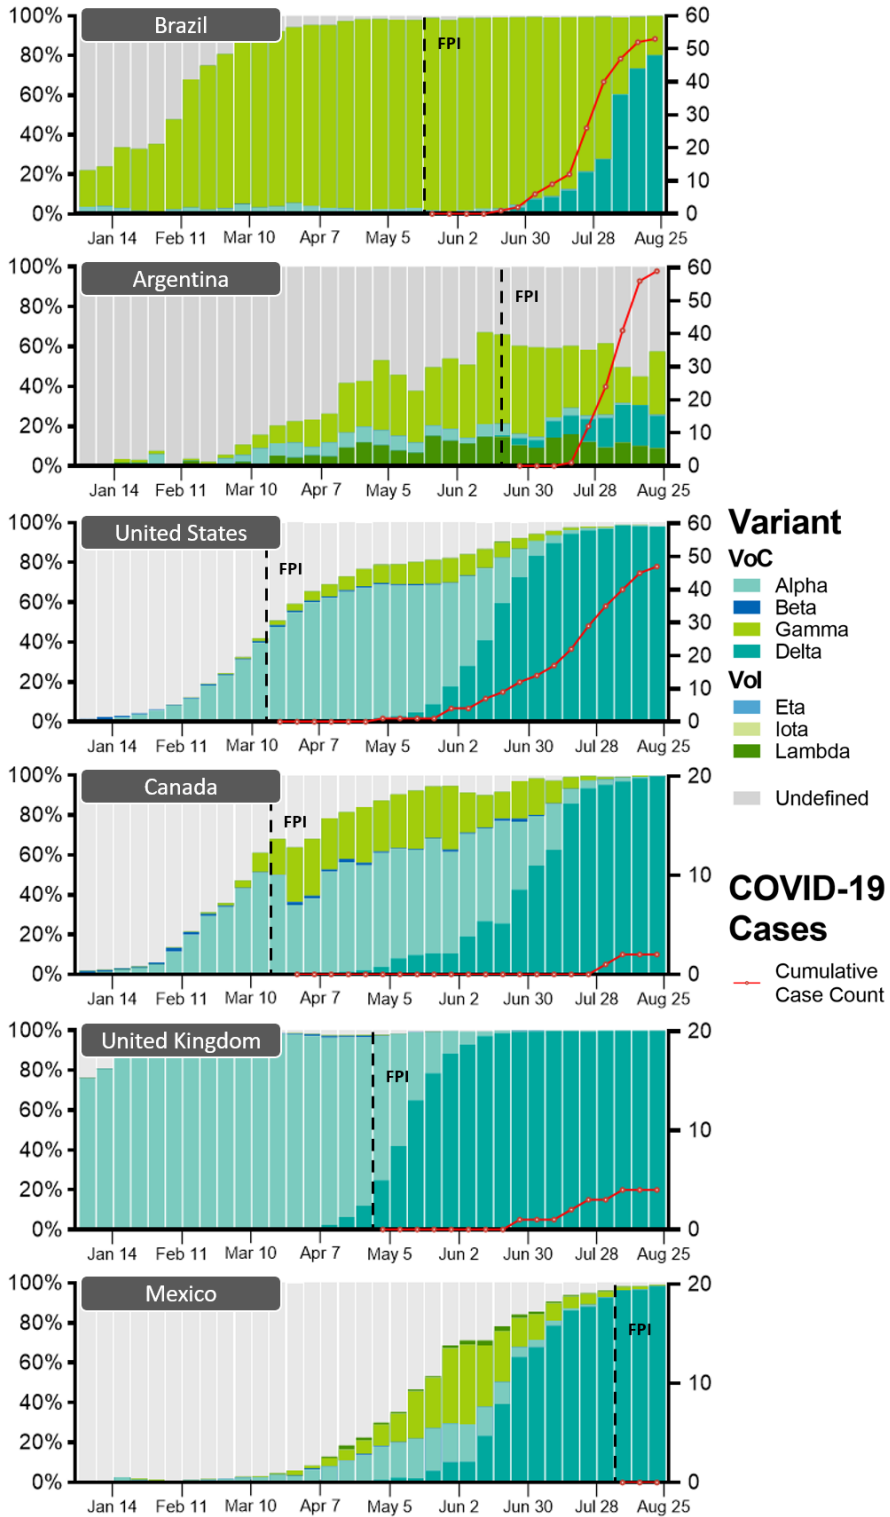

51

52



53 *Supplementary Table S1 | Summary of demographics in the ITT set (NCT04636697)*

54 'N' is the number of participants in a population, while 'n' represents the number of  
 55 participants in a category. Race or ethnic group was reported by the participants (who could  
 56 have listed more than one category). SD: Standard deviation; Min.: Minimum; Max.: Maximum

|                                           | Healthy Adult   |                 | Older Adults (65+) |                | Adults with Comorbidities |                 | All Participants |                  |
|-------------------------------------------|-----------------|-----------------|--------------------|----------------|---------------------------|-----------------|------------------|------------------|
|                                           | CoVLP + AS03    | Placebo         | CoVLP + AS03       | Placebo        | CoVLP + AS03              | Placebo         | CoVLP + AS03     | Placebo          |
| <b>Participants (N)</b>                   | 10,816          | 10,835          | 62                 | 65             | 1195                      | 1166            | 12,074           | 12,066           |
| <b>Sex, n (%)</b>                         |                 |                 |                    |                |                           |                 |                  |                  |
| Male                                      | 5,460<br>(50.5) | 5,553<br>(51.3) | 35 (56.5)          | 35 (53.8)      | 612<br>(51.2)             | 598<br>(51.3)   | 6,107<br>(50.6)  | 6,186<br>(51.3)  |
| Female                                    | 5,356<br>(49.5) | 5,282<br>(48.7) | 27 (43.5)          | 30 (46.2)      | 583<br>(48.8)             | 568<br>(48.7)   | 5,966<br>(49.4)  | 5,880<br>(48.7)  |
| <b>Race, n (%)</b>                        |                 |                 |                    |                |                           |                 |                  |                  |
| American Indian/ Alaska Native            | 27 (0.2)        | 23 (0.2)        | 0                  | 0              | 3 (0.3)                   | 7 (0.6)         | 30 (0.2)         | 30 (0.2)         |
| Asian                                     | 137 (1.3)       | 137 (1.3)       | 1 (1.6)            | 0              | 11<br>(0.9)               | 10<br>(0.9)     | 149 (1.2)        | 147 (1.2)        |
| Black/ African American                   | 681 (6.3)       | 667 (6.2)       | 8<br>(12.9)        | 13 (20.0)      | 160<br>(13.4)             | 155<br>(13.3)   | 849 (7.0)        | 835 (6.9)        |
| Multiple                                  | 197 (1.8)       | 237 (2.2)       | 1<br>(1.6)         | 0              | 26<br>(2.2)               | 26<br>(2.2)     | 224 (1.9)        | 263 (2.2)        |
| Native Hawaiian or Other Pacific Islander | 24 (0.2)        | 21 (0.2)        | 0                  | 0              | 2 (0.2)                   | 4 (0.3)         | 26 (0.2)         | 25 (0.2)         |
| White or Caucasian                        | 9,694<br>(89.6) | 9,690<br>(89.4) | 51 (82.3)          | 51 (78.5)      | 981<br>(82.1)             | 959<br>(82.2)   | 10,726<br>(88.8) | 10,700<br>(88.7) |
| Other                                     | 1 (<0.1)        | 2 (<0.1)        | 0                  | 0              | 0                         | 0               | 1 (<0.1)         | 2 (<0.1)         |
| Not Reported                              | 52 (0.5)        | 54 (0.5)        | 0                  | 1 (1.5)        | 10 (0.8)                  | 5 (0.4)         | 62 (0.5)         | 60 (0.5)         |
| <b>Ethnicity, n (%)</b>                   |                 |                 |                    |                |                           |                 |                  |                  |
| Hispanic or Latinx                        | 8,965<br>(82.9) | 8,955<br>(82.6) | 15 (24.2)          | 26 (40.0)      | 915<br>(76.6)             | 915<br>(78.5)   | 9,895<br>(82.0)  | 9,896<br>(82.0)  |
| Not Hispanic or Latinx                    | 1,800<br>(16.6) | 1,830<br>(16.9) | 47 (75.8)          | 39 (60.0)      | 273<br>(22.8)             | 241<br>(20.7)   | 2,120<br>(17.6)  | 2,110<br>(17.5)  |
| Not Reported/ Specified                   | 51 (0.5)        | 50 (0.5)        | 0                  | 0              | 7 (0.6)                   | 10 (0.9)        | 58 (0.5)         | 60 (0.5)         |
| <b>Age at consent (years)</b>             |                 |                 |                    |                |                           |                 |                  |                  |
| Mean (SD)                                 | 32.0<br>(11.07) | 31.9<br>(11.02) | 69.9<br>(4.15)     | 69.5<br>(5.00) | 38.8<br>(13.72)           | 39.2<br>(14.14) | 32.8<br>(11.82)  | 32.8<br>(11.85)  |
| Median                                    | 29.0            | 29.0            | 69.0               | 68.0           | 37.0                      | 38.0            | 29.0             | 29.0             |
| Min, Max                                  | 18, 64          | 18, 64          | 65, 80             | 65, 86         | 18, 82                    | 18, 86          | 18, 82           | 18, 86           |

57 *Supplementary Table S2 | Baseline Comorbidities*

58 ‘N’ is the total number of participants who received a given vaccination. ‘n’ is the number of a  
 59 participants who reported the specified comorbid condition and is shown as a percentage in  
 60 brackets. Comorbidities reported for  $\leq 0.1\%$  of the total population have not been included.

61

| n (%)                                             | CoVLP+AS03<br>N = 12036 | Placebo<br>N = 12040 | Total<br>N = 24076 |
|---------------------------------------------------|-------------------------|----------------------|--------------------|
| <b>Participants with at least one comorbidity</b> | <b>1781 (14.8)</b>      | <b>1686 (14.0)</b>   | <b>3467 (14.4)</b> |
| Obesity                                           | 1246 (10.4)             | 1171 (9.7)           | 2417 (10.0)        |
| Documented Hypertension                           | 340 (2.8)               | 322 (2.8)            | 672 (2.8)          |
| Type 2 Diabetes                                   | 116 (1.0)               | 100 (0.8)            | 216 (0.9)          |
| Chronic Obstructive Lung disease (COPD)           | 41 (0.3)                | 45 (0.4)             | 86 (0.4)           |
| Immunocompromised                                 | 48 (0.4)                | 40 (0.3)             | 88 (0.4)           |
| Cardiovascular disease                            | 40 (0.3)                | 41 (0.3)             | 81 (0.3)           |
| Asthma                                            | 25 (0.2)                | 17 (0.1)             | 42 (0.2)           |

62 *Supplementary Table S3 | Efficacy by Subgroup (ITT)*

63 For most subgroups (1), values indicate the number of positive cases (total number of  
 64 participants in the subgroup: percentage positivity). For variants (2), values indicate number of  
 65 sequenced cases assigned to the variant (percent positive). Yrs indicate years, 95% CI indicates  
 66 95% confidence interval. VE indicates Vaccine Efficacy and NA indicates not applicable.

| <b>Subgroup</b>                    | <b>Placebo</b>     | <b>CoVLP+AS03</b>  | <b>VE (95% CI)</b>    |
|------------------------------------|--------------------|--------------------|-----------------------|
| <b>All Participants</b>            | 125 (12,067; 1.0%) | 40 (12,074; 0.3%)  | 69.5 (56.7, 78.8)     |
| <b>Baseline Health, Age</b>        |                    |                    |                       |
| Healthy, ≥18 to <65 yrs            | 111 (10,835; 1.0%) | 36 (10,0816; 0.3%) | 68.9 (55.0, 78.9)     |
| Healthy, ≥65 yrs                   | 1 (65; 1.5%)       | 1 (62, 1.6%)       | 12.9 (-3,295.5, 97.8) |
| Significant comorbidities, ≥18 yrs | 13 (1,166; 1.1%)   | 3 (1,195, 0.3%)    | 78.6 (30.2, 95.1)     |
| <b>Sex</b>                         |                    |                    |                       |
| Male                               | 58 (6,186; 0.9%)   | 22 (6,107, 0.4%)   | 63.5 (41.0, 78.1)     |
| Female                             | 67 (5,880; 1.1%)   | 18 (5,966, 0.3%)   | 74.5 (57.8, 85.2)     |
| <b>Race or Ethnic Group</b>        |                    |                    |                       |
| Asian                              | 2 (147; 1.4%)      | 0 (149; 0%)        | 100.0 (-195.1, NA)    |
| Black or African American          | 9 (835; 1.1%)      | 5 (849; 0.6%)      | 47.3 (-57.6, 84.0)    |
| White or Caucasian                 | 107 (10,700; 1.0%) | 34 (10,726; 0.3%)  | 69.7 (55.7, 79.6)     |
| Latinx or Hispanic                 | 88 (9,896; 0.9%)   | 31 (9,895; 0.3%)   | 66.6 (50.1, 78.1)     |
| Not Latinx or Hispanic             | 37 (2,110; 1.8%)   | 9 (2,120; 0.4%)    | 76.6 (52.8, 89.3)     |
| <b>Disease Severity</b>            |                    |                    |                       |
| Moderate                           | 33 (12,067; 0.3%)  | 8 (12,074; <0.1%)  | 76.8 (51.4, 90.0)     |
| Moderate/Severe                    | 36 (12,067; 0.3%)  | 8 (12,074; <0.1%)  | 78.8 (55.8, 90.8)     |
| Severe                             | 3 (12,067; <0.1%)  | 0 (12,074; 0%)     | 100.0 (-63.7, NA)     |
| <b>Seropositivity at Baseline</b>  |                    |                    |                       |
| Seropositive                       | 3 (1,791; 0.2%)    | 6 (1,776; 0.3%)    | -94.3 (-852.1, 51.6)  |
| Seronegative                       | 121 (10,106; 1.2%) | 33 (10,115; 0.3%)  | 74.0 (62.1, 82.5)     |
| <b>Variants</b>                    |                    |                    |                       |
| Ancestral                          | 0 (0%)             | 0 (0%)             | NA                    |
| Alpha                              | 6 (<0.1%)          | 0 (0%)             | 100 (38.2 NA)         |
| Beta                               | 0 (0%)             | 0 (0%)             | NA                    |
| Gamma                              | 47 (0.4%)          | 6 (<0.1%)          | 87.8 (73.0, 95.3)     |
| Delta                              | 44 (0.4%)          | 12 (<0.1%)         | 74.0 (51.7, 86.8)     |
| Lambda                             | 3 (<0.1%)          | 0 (0%)             | 100 (-63.7, NA)       |
| Mu                                 | 4 (<0.1%)          | 0 (0%)             | 100.0 (-6.4, NA)      |
| Omicron                            | 0 (0%)             | 0 (0%)             | NA                    |

67

68 *Supplementary Table S4 / Incidence of Solicited Local Adverse Events (Safety Analysis Set)*

69 ‘N’ is the total number of participants in the Safety Analysis Set who received a given  
 70 vaccination. ‘n’ is the number of a participants reporting at least 1 occurrence of the specified  
 71 event category and is shown as a percentage in brackets. For each category, Grade 1 = Mild;  
 72 Grade 2 = Moderate; Grade 3 = Severe; Grade 4 = Potentially life threatening. If a participant  
 73 had the same AE but with different grades over time, the highest grade was reported. ‘Missing’  
 74 rows counted participants within the population if they did not have a non-missing assessment  
 75 or had an assessment with a non-graded value.

| n (%)                                | Vaccination 1      |                     | Vaccination 2       |                     | Overall             |                     |
|--------------------------------------|--------------------|---------------------|---------------------|---------------------|---------------------|---------------------|
|                                      | CoVLP+ AS03        | Placebo             | CoVLP+ AS03         | Placebo             | CoVLP+ AS03         | Placebo             |
|                                      | N = 4 136          | N = 3 683           | N = 4 136           | N = 3 683           | N = 4 136           | N = 3 683           |
| <b>At least 1 solicited local AE</b> | <b>3538 (85.5)</b> | <b>1149 (31.2)</b>  | <b>3496 (84.5)</b>  | <b>1135 (30.8)</b>  | <b>3819 (92.3)</b>  | <b>1677 (45.5)</b>  |
| Grade 1                              | 3021 (73.0)        | 1123 (30.5)         | 2494 (60.3)         | 1111 (30.2)         | 2590 (62.6)         | 1629 (44.2)         |
| Grade 2                              | 484 (11.7)         | 24 (0.7)            | 917 (22.2)          | 23 (0.6)            | 1115 (27.0)         | 45 (1.2)            |
| Grade 3                              | 33 (0.8)           | 2 (<0.1)            | 85 (2.1)            | 1 (<0.1)            | 114 (2.8)           | 3 (<0.1)            |
| Grade 4                              | 0                  | 0                   | 0                   | 0                   | 0                   | 0                   |
| Missing                              | 4 (<0.1)           | 6 (0.2)             | 74 (1.8)            | 12 (0.3)            | 2 (<0.1)            | 5 (0.1)             |
| <b>Pain</b>                          | <b>3514 (85.0)</b> | <b>1 082 (29.4)</b> | <b>3 483 (84.2)</b> | <b>1 100 (29.9)</b> | <b>3 806 (92.0)</b> | <b>1 604 (43.6)</b> |
| Grade 1                              | 3 072 (74.3)       | 1 066 (28.9)        | 2 625 (63.5)        | 1 080 (29.3)        | 2 758 (66.7)        | 1 570 (42.6)        |
| Grade 2                              | 420 (10.2)         | 15 (0.4)            | 830 (20.1)          | 20 (0.5)            | 999 (24.2)          | 33 (0.9)            |
| Grade 3                              | 22 (0.5)           | 1 (<0.1)            | 28 (0.7)            | 0                   | 49 (1.2)            | 1 (<0.1)            |
| Grade 4                              | 0                  | 0                   | 0                   | 0                   | 0                   | 0                   |
| Missing                              | 4 (<0.1)           | 6 (0.2)             | 74 (1.8)            | 12 (0.3)            | 2 (<0.1)            | 5 (0.1)             |
| <b>Redness</b>                       | <b>281 (6.8)</b>   | <b>107 (2.9)</b>    | <b>633 (15.3)</b>   | <b>77 (2.1)</b>     | <b>815 (19.7)</b>   | <b>167 (4.5)</b>    |
| Grade 1                              | 238 (5.8)          | 101 (2.7)           | 446 (10.8)          | 75 (2.0)            | 596 (14.4)          | 159 (4.3)           |
| Grade 2                              | 36 (0.9)           | 5 (0.1)             | 145 (3.5)           | 1 (<0.1)            | 172 (4.2)           | 6 (0.2)             |
| Grade 3                              | 7 (0.2)            | 1 (<0.1)            | 42 (1.0)            | 1 (<0.1)            | 47 (1.1)            | 2 (<0.1)            |
| Grade 4                              | 0                  | 0                   | 0                   | 0                   | 0                   | 0                   |
| Missing                              | 6 (0.1)            | 8 (0.2)             | 76 (1.8)            | 13 (0.4)            | 3 (<0.1)            | 5 (0.1)             |
| <b>Swelling</b>                      | <b>774 (18.7)</b>  | <b>108 (2.9)</b>    | <b>1241 (30.0)</b>  | <b>113 (3.1)</b>    | <b>1548 (37.4)</b>  | <b>200 (5.4)</b>    |
| Grade 1                              | 660 (16.0)         | 100 (2.7)           | 974 (23.5)          | 110 (3.0)           | 1211 (29.3)         | 189 (5.1)           |
| Grade 2                              | 102 (2.5)          | 7 (0.2)             | 240 (5.8)           | 3 (<0.1)            | 300 (7.3)           | 10 (0.3)            |
| Grade 3                              | 12 (0.3)           | 1 (<0.1)            | 27 (0.7)            | 0                   | 37 (0.9)            | 1 (<0.1)            |
| Grade 4                              | 0                  | 0                   | 0                   | 0                   | 0                   | 0                   |
| Missing                              | 5 (0.1)            | 6 (0.2)             | 74 (1.8)            | 12 (0.3)            | 2 (<0.1)            | 5 (0.1)             |

76 *Supplementary Table S5 / Incidence of Solicited Systemic Adverse Events (Safety Analysis Set)*  
77 'N' is the total number of participants in the Safety Analysis Set who received a given  
78 vaccination. 'n' is the number of a participants reporting at least 1 occurrence of the specified  
79 event category and is shown as a percentage in brackets. For each category, Grade 1 = Mild;  
80 Grade 2 = Moderate; Grade 3 = Severe; Grade 4 = Potentially life threatening. If a participant  
81 had the same AE but with different grades over time, the highest grade was reported. 'Missing'  
82 rows counted participants within the population if they did not have a non-missing assessment  
83 or had an assessment with a non-graded value. Medically implausible fever temperature values  
84 were excluded from table.

| n (%)                                   | Vaccination 1            |                      | Vaccination 2            |                      | Overall                  |                      |
|-----------------------------------------|--------------------------|----------------------|--------------------------|----------------------|--------------------------|----------------------|
|                                         | CoVLP+ AS03<br>N = 4 136 | Placebo<br>N = 3 683 | CoVLP+ AS03<br>N = 4 136 | Placebo<br>N = 3 683 | CoVLP+ AS03<br>N = 4 136 | Placebo<br>N = 3 683 |
| <b>At least 1 solicited systemic AE</b> | <b>2835 (68.5)</b>       | <b>2023 (54.9)</b>   | <b>3190 (77.1)</b>       | <b>1517 (41.2)</b>   | <b>3612 (87.3)</b>       | <b>2394 (65.0)</b>   |
| Grade 1                                 | 2017 (48.8)              | 1602 (43.5)          | 1388 (33.6)              | 1147 (31.1)          | 1538 (37.2)              | 1734 (47.1)          |
| Grade 2                                 | 776 (18.8)               | 397 (10.8)           | 1671 (40.4)              | 349 (9.5)            | 1906 (46.1)              | 617 (16.8)           |
| Grade 3                                 | 42 (1.0)                 | 24 (0.7)             | 129 (3.1)                | 20 (0.5)             | 166 (4.0)                | 42 (1.1)             |
| Grade 4                                 | 0                        | 0                    | 2 (<0.1)                 | 1 (<0.1)             | 2 (<0.1)                 | 1 (<0.1)             |
| Missing                                 | 2 (<0.1)                 | 6 (0.2)              | 72 (1.7)                 | 12 (0.3)             | 2 (<0.1)                 | 5 (0.1)              |
| <b>Chills</b>                           | <b>571 (13.8)</b>        | <b>352 (9.6)</b>     | <b>1 693 (40.9)</b>      | <b>263 (7.1)</b>     | <b>1 889 (45.7)</b>      | <b>522 (14.2)</b>    |
| Grade 1                                 | 469 (11.3)               | 314 (8.5)            | 966 (23.4)               | 228 (6.2)            | 1 108 (26.8)             | 451 (12.2)           |
| Grade 2                                 | 98 (2.4)                 | 38 (1.0)             | 702 (17.0)               | 34 (0.9)             | 753 (18.2)               | 70 (1.9)             |
| Grade 3                                 | 4 (<0.1)                 | 0                    | 24 (0.6)                 | 1 (<0.1)             | 27 (0.7)                 | 1 (<0.1)             |
| Grade 4                                 | 0                        | 0                    | 1 (<0.1)                 | 0                    | 1 (<0.1)                 | 0                    |
| Missing                                 | 8 (0.2)                  | 9 (0.2)              | 74 (1.8)                 | 12 (0.3)             | 2 (<0.1)                 | 5 (0.1)              |
| <b>Fatigue</b>                          | <b>1 490 (36.0)</b>      | <b>1 038 (28.2)</b>  | <b>2 277 (55.1)</b>      | <b>792 (21.5)</b>    | <b>2 634 (63.7)</b>      | <b>1 352 (36.7)</b>  |
| Grade 1                                 | 1 144 (27.7)             | 820 (22.3)           | 1 270 (30.7)             | 638 (17.3)           | 1 460 (35.3)             | 1 018 (27.6)         |
| Grade 2                                 | 332 (8.0)                | 206 (5.6)            | 942 (22.8)               | 142 (3.9)            | 1 096 (26.5)             | 311 (8.4)            |
| Grade 3                                 | 14 (0.3)                 | 12 (0.3)             | 65 (1.6)                 | 12 (0.3)             | 78 (1.9)                 | 23 (0.6)             |
| Grade 4                                 | 0                        | 0                    | 0                        | 0                    | 0                        | 0                    |
| Missing                                 | 8 (0.2)                  | 8 (0.2)              | 72 (1.7)                 | 12 (0.3)             | 2 (<0.1)                 | 5 (0.1)              |
| <b>Feeling of General Discomfort</b>    | <b>1 200 (29.0)</b>      | <b>699 (19.0)</b>    | <b>2280 (55.1)</b>       | <b>574 (15.6)</b>    | <b>2 595 (62.7)</b>      | <b>1002 (27.2)</b>   |
| Grade 1                                 | 907 (21.9)               | 582 (15.8)           | 1 154                    | 459 (12.5)           | 1 341                    | 784 (21.3)           |

| n (%)                                             | Vaccination 1            |                      | Vaccination 2            |                      | Overall                  |                      |
|---------------------------------------------------|--------------------------|----------------------|--------------------------|----------------------|--------------------------|----------------------|
|                                                   | CoVLP+ AS03<br>N = 4 136 | Placebo<br>N = 3 683 | CoVLP+ AS03<br>N = 4 136 | Placebo<br>N = 3 683 | CoVLP+ AS03<br>N = 4 136 | Placebo<br>N = 3 683 |
| Grade 2                                           | 278 (6.7)                | 111 (3.0)            | (27.9)<br>1 089 (26.3)   | 109 (3.0)            | (32.4)<br>1 203 (29.1)   | 207 (5.6)            |
| Grade 3                                           | 15 (0.4)                 | 6 (0.2)              | 36 (0.9)                 | 6 (0.2)              | 50 (1.2)                 | 11 (0.3)             |
| Grade 4                                           | 0                        | 0                    | 1 (<0.1)                 | 0                    | 1 (<0.1)                 | 0                    |
| Missing                                           | 8 (0.2)                  | 9 (0.2)              | 74 (1.8)                 | 13 (0.4)             | 2 (<0.1)                 | 5 (0.1)              |
| <b>Feeling of Swelling in the Axilla (Armpit)</b> | <b>266 (6.4)</b>         | <b>123 (3.3)</b>     | <b>461 (11.1)</b>        | <b>71 (1.9)</b>      | <b>613 (14.8)</b>        | <b>182 (4.9)</b>     |
| Grade 1                                           | 233 (5.6)                | 121 (3.3)            | 389 (9.4)                | 66 (1.8)             | 515 (12.5)               | 175 (4.8)            |
| Grade 2                                           | 32 (0.8)                 | 2 (<0.1)             | 70 (1.7)                 | 5 (0.1)              | 95 (2.3)                 | 7 (0.2)              |
| Grade 3                                           | 1 (<0.1)                 | 0                    | 2 (<0.1)                 | 0                    | 3 (<0.1)                 | 0                    |
| Grade 4                                           | 0                        | 0                    | 0                        | 0                    | 0                        | 0                    |
| Missing                                           | 8 (0.2)                  | 9 (0.2)              | 75 (1.8)                 | 13 (0.4)             | 3 (<0.1)                 | 5 (0.1)              |
| <b>Feeling of Swelling in the Neck</b>            | <b>475 (11.5)</b>        | <b>328 (8.9)</b>     | <b>632 (15.3)</b>        | <b>245 (6.7)</b>     | <b>905 (21.9)</b>        | <b>484 (13.1)</b>    |
| Grade 1                                           | 427 (10.3)               | 298 (8.1)            | 514 (12.4)               | 217 (5.9)            | 746 (18.0)               | 432 (11.7)           |
| Grade 2                                           | 46 (1.1)                 | 28 (0.8)             | 112 (2.7)                | 28 (0.8)             | 151 (3.7)                | 50 (1.4)             |
| Grade 3                                           | 2 (<0.1)                 | 2 (<0.1)             | 6 (0.1)                  | 0                    | 8 (0.2)                  | 2 (<0.1)             |
| Grade 4                                           | 0                        | 0                    | 0                        | 0                    | 0                        | 0                    |
| Missing                                           | 8 (0.2)                  | 9 (0.2)              | 75 (1.8)                 | 13 (0.4)             | 3 (<0.1)                 | 5 (0.1)              |
| <b>Fever</b>                                      | <b>44 (1.1)</b>          | <b>34 (0.9)</b>      | <b>355 (8.6)</b>         | <b>18 (0.5)</b>      | <b>390 (9.4)</b>         | <b>52 (1.4)</b>      |
| Grade 1                                           | 31 (0.7)                 | 26 (0.7)             | 259 (6.3)                | 10 (0.3)             | 282 (6.8)                | 36 (1.0)             |
| Grade 2                                           | 10 (0.2)                 | 7 (0.2)              | 70 (1.7)                 | 6 (0.2)              | 79 (1.9)                 | 13 (0.4)             |
| Grade 3                                           | 3 (<0.1)                 | 1 (<0.1)             | 25 (0.6)                 | 2 (<0.1)             | 28 (0.7)                 | 3 (<0.1)             |
| Grade 4                                           | 0                        | 0                    | 1 (<0.1)                 | 0                    | 1 (<0.1)                 | 0                    |
| Missing                                           | 59 (1.4)                 | 59 (1.6)             | 92 (2.2)                 | 27 (0.7)             | 8 (0.2)                  | 11 (0.3)             |
| <b>Headache</b>                                   | <b>1 644 (39.7)</b>      | <b>1 299 (35.3)</b>  | <b>2 325 (56.2)</b>      | <b>940 (25.5)</b>    | <b>2 786 (67.4)</b>      | <b>1 662 (45.1)</b>  |
| Grade 1                                           | 1 288 (31.1)             | 1 089 (29.6)         | 1 363 (33.0)             | 732 (19.9)           | 1 634 (39.5)             | 1 300 (35.3)         |
| Grade 2                                           | 342 (8.3)                | 200 (5.4)            | 927 (22.4)               | 196 (5.3)            | 1 105 (26.7)             | 341 (9.3)            |
| Grade 3                                           | 14 (0.3)                 | 10 (0.3)             | 34 (0.8)                 | 11 (0.3)             | 46 (1.1)                 | 20 (0.5)             |
| Grade 4                                           | 0                        | 0                    | 1 (<0.1)                 | 1 (<0.1)             | 1 (<0.1)                 | 1 (<0.1)             |
| Missing                                           | 6 (0.1)                  | 9 (0.2)              | 74 (1.8)                 | 13 (0.4)             | 2 (<0.1)                 | 5 (0.1)              |
| <b>Joint Aches</b>                                | <b>642 (15.5)</b>        | <b>406 (11.0)</b>    | <b>1 361 (32.9)</b>      | <b>313 (8.5)</b>     | <b>1 627 (39.3)</b>      | <b>595 (16.2)</b>    |
| Grade 1                                           | 510 (12.3)               | 355 (9.6)            | 838 (20.3)               | 268 (7.3)            | 1 028 (24.9)             | 502 (13.6)           |
| Grade 2                                           | 129 (3.1)                | 47 (1.3)             | 504 (12.2)               | 44 (1.2)             | 578 (14.0)               | 88 (2.4)             |
| Grade 3                                           | 3 (<0.1)                 | 4 (0.1)              | 19 (0.5)                 | 1 (<0.1)             | 21 (0.5)                 | 5 (0.1)              |
| Grade 4                                           | 0                        | 0                    | 0                        | 0                    | 0                        | 0                    |

| n (%)               | Vaccination 1            |                      | Vaccination 2            |                      | Overall                  |                         |
|---------------------|--------------------------|----------------------|--------------------------|----------------------|--------------------------|-------------------------|
|                     | CoVLP+ AS03<br>N = 4 136 | Placebo<br>N = 3 683 | CoVLP+ AS03<br>N = 4 136 | Placebo<br>N = 3 683 | CoVLP+ AS03<br>N = 4 136 | Placebo<br>N = 3 683    |
| Missing             | 8 (0.2)                  | 8 (0.2)              | 72 (1.7)                 | 12 (0.3)             | 2 (<0.1)                 | 5 (0.1)                 |
| <b>Muscle Aches</b> | <b>1 768<br/>(42.7)</b>  | <b>771 (20.9)</b>    | <b>2 273<br/>(55.0)</b>  | <b>617 (16.8)</b>    | <b>2770<br/>(67.0)</b>   | <b>1 083<br/>(29.4)</b> |
| Grade 1             | 1 437<br>(34.7)          | 698 (19.0)           | 1 354<br>(32.7)          | 539 (14.6)           | 1 683<br>(40.7)          | 944 (25.6)              |
| Grade 2             | 318 (7.7)                | 71 (1.9)             | 875 (21.2)               | 73 (2.0)             | 1 031<br>(24.9)          | 133 (3.6)               |
| Grade 3             | 13 (0.3)                 | 2 (<0.1)             | 43 (1.0)                 | 5 (0.1)              | 55 (1.3)                 | 6 (0.2)                 |
| Grade 4             | 0                        | 0                    | 1 (<0.1)                 | 0                    | 1 (<0.1)                 | 0                       |
| Missing             | 7 (0.2)                  | 8 (0.2)              | 72 (1.7)                 | 12 (0.3)             | 2 (<0.1)                 | 5 (0.1)                 |

85

86 *Supplementary Table S6 / Overall Summary of Unsolicited Adverse Events Twenty-One Days*  
87 *after Each Vaccine (Safety Analysis Set)*

88 ‘N’ is the total number of participants in the Safety Analysis Set who received a given  
89 vaccination. ‘n’ is the number of a participants reporting at least 1 occurrence of the specified  
90 event category and is shown as a percentage in brackets. Grade 3 = Severe. Abbreviations: AE,  
91 adverse event; AESI, adverse event of special interest; CoVLP, coronavirus-like particle;  
92 MAAE, medically attended adverse event; n, number of subjects in category; pIMDs, potential  
93 immune-mediated diseases, SAE, serious adverse event; VAED, vaccine-associated enhanced  
94 disease.

| n (%)                                     | Vaccination 1            |                      | Vaccination 2            |                      | Overall                  |                     |
|-------------------------------------------|--------------------------|----------------------|--------------------------|----------------------|--------------------------|---------------------|
|                                           | CoVLP+ AS03<br>N= 12 036 | Placebo<br>N= 12 040 | CoVLP+ AS03<br>N= 11 312 | Placebo<br>N= 10 775 | CoVLP+ AS03<br>N= 12 036 | Placebo<br>N= 12040 |
| <b>Immediate Unsolicited AEs</b>          | 19 (0.2)                 | 19 (0.2)             | 4 (<0.1)                 | 7 (<0.1)             | 23 (0.2)                 | 26 (0.2)            |
| <b>Unsolicited AEs</b>                    | 1 722 (14.3)             | 1 647 (13.7)         | 1 424 (12.6)             | 1 132 (10.5)         | 2 735 (22.7)             | 2 451 (20.4)        |
| ≥ Grade 3                                 | 39 (0.3)                 | 38 (0.3)             | 30 (0.3)                 | 30 (0.3)             | 69 (0.6)                 | 65 (0.5)            |
| <b>SAEs</b>                               | 13 (0.1)                 | 9 (<0.1)             | 11 (<0.1)                | 8 (<0.1)             | 24 (0.2)                 | 16 (0.1)            |
| <b>Related SAEs</b>                       | 0                        | 0                    | 0                        | 0                    | 0                        | 0                   |
| <b>MAAEs</b>                              | 287 (2.4)                | 276 (2.3)            | 242 (2.1)                | 230 (2.1)            | 509 (4.2)                | 490 (4.1)           |
| <b>Related MAAEs</b>                      | 28 (0.2)                 | 21 (0.2)             | 20 (0.2)                 | 22 (0.2)             | 48 (0.4)                 | 43 (0.4)            |
| <b>AEs Leading to Study Withdrawal</b>    | 1 (<0.1)                 | 5 (<0.1)             | 0                        | 2 (<0.1)             | 1 (<0.1)                 | 7 (<0.1)            |
| <b>AESIs Reported by the Investigator</b> | 2 (<0.1)                 | 0                    | 2 (<0.1)                 | 0                    | 4 (<0.1)                 | 0                   |
| <b>AESIs Identified by Data analysis</b>  |                          |                      |                          |                      |                          |                     |
| Potential VAED                            | 0                        | 0                    | 0                        | 0                    | 0                        | 0                   |
| Related Potential VAED                    | 0                        | 0                    | 0                        | 0                    | 0                        | 0                   |
| Related Anaphylactic Reactions            | 0                        | 0                    | 0                        | 0                    | 0                        | 0                   |
| pIMDs                                     | 8 (<0.1)                 | 5 (<0.1)             | 7 (<0.1)                 | 3 (<0.1)             | 15 (0.1)                 | 8 (<0.1)            |
| Related pIMDs                             | 1 (<0.1)                 | 0                    | 1 (<0.1)                 | 1 (<0.1)             | 2 (<0.1)                 | 1 (<0.1)            |
| <b>AEs Leading to Death</b>               | 0                        | 2 (<0.1)             | 0                        | 2 (<0.1)             | 0                        | 4 (<0.1)            |



95 *Supplementary Table S7 | Overall Summary of Unsolicited Adverse Events 43 to 201 Days after*  
 96 *Second Vaccination (Safety Analysis Set)*

97 ‘N’ is the total number of participants in the Safety Analysis Set who received a given  
 98 vaccination. ‘n’ is the number of a participants reporting at least 1 occurrence of the specified  
 99 event category and is shown as a percentage in brackets. Grade 3 = Severe. Abbreviations: AE,  
 100 adverse event; AESI, adverse event of special interest; CoVLP, coronavirus-like particle;  
 101 MAAE, medically attended adverse event; n, number of subjects in category; pIMDs, potential  
 102 immune-mediated diseases, SAE, serious adverse event; VAED, vaccine-associated enhanced  
 103 disease.

| n (%)                                     | Vaccination 1            |                      | Vaccination 2            |                       | Overall                  |                       |
|-------------------------------------------|--------------------------|----------------------|--------------------------|-----------------------|--------------------------|-----------------------|
|                                           | CoVLP+ AS03<br>N= 12 036 | Placebo<br>N= 12 040 | CoVLP+ AS03<br>N= 11 312 | Placebo<br>N= 10 775  | CoVLP+ AS03<br>N= 12 036 | Placebo<br>N= 12040   |
| <b>Unsolicited AEs</b><br>≥ Grade 3       | 1 (<0.1)<br>0            | 5 (<0.1)<br>1 (<0.1) | 510 (4.5)<br>21 (0.2)    | 475 (4.4)<br>28 (0.3) | 511 (4.2)<br>21 (0.2)    | 480 (4.0)<br>29 (0.2) |
| <b>SAEs</b>                               | 0                        | 2 (<0.1)             | 19 (0.2)                 | 20 (0.2)              | 19 (0.2)                 | 22 (0.2)              |
| <b>Related SAEs</b>                       | 0                        | 0                    | 0                        | 1 (<0.1)              | 0                        | 1 (<0.1)              |
| <b>MAAEs</b>                              | 1 (<0.1)                 | 3 (<0.1)             | 199 (1.8)                | 197 (1.8)             | 200 (1.7)                | 200 (1.7)             |
| <b>Related MAAEs</b>                      | 0                        | 0                    | 2 (<0.1)                 | 2 (<0.1)              | 2 (<0.1)                 | 2 (<0.1)              |
| <b>AEs Leading to Study Withdrawal</b>    | 1 (<0.1)                 | 0                    | 3 (<0.1)                 | 5 (<0.1)              | 4 (<0.1)                 | 5 (<0.1)              |
| <b>AESIs Reported by the Investigator</b> | 0                        | 0                    | 2 (<0.1)                 | 0                     | 2 (<0.1)                 | 0                     |
| <b>AESIs Identified by Data analysis</b>  |                          |                      |                          |                       |                          |                       |
| Potential VAED                            | 0                        | 0                    | 0                        | 0                     | 0                        | 0                     |
| Related Potential VAED                    | 0                        | 0                    | 0                        | 0                     | 0                        | 0                     |
| Related Anaphylactic Reactions            | 0                        | 0                    | 0                        | 0                     | 0                        | 0                     |
| pIMDs                                     | 0                        | 0                    | 6 (<0.1)                 | 2 (<0.1)              | 6 (<0.1)                 | 2 (<0.1)              |
| Related pIMDs                             | 0                        | 0                    | 0                        | 0                     | 0                        | 0                     |
| <b>AEs Leading to Death</b>               | 0                        | 0                    | 4 (<0.1)                 | 5 (<0.1)              | 4 (<0.1)                 | 5 (<0.1)              |

104

105

106 *Supplementary Table S8 / Incidence of Unsolicited Adverse Events (Safety Analysis Set)*  
 107 'N' is the total number of participants in the Safety Analysis Set who received a given  
 108 vaccination. 'n' is the number of a participants reporting at least 1 occurrence of the specified  
 109 event PT category and is shown as a percentage in brackets. All events PT reported in  $\geq 1\%$  of  
 110 subjects after receiving first and or second treatment in CoVLP+AS03 treatment group are  
 111 listed. PT, preferred term.

| n (%)                                          | Vaccination 1           |                         | Vaccination 2           |                         | Overall                 |                         |
|------------------------------------------------|-------------------------|-------------------------|-------------------------|-------------------------|-------------------------|-------------------------|
|                                                | CoVLP+<br>AS03          | Placebo                 | CoVLP+<br>AS03          | Placebo                 | CoVLP+<br>AS03          | Placebo                 |
|                                                | N= 12 036               | N= 12 040               | N= 11 312               | N= 10 775               | N= 12 036               | N= 12040                |
| <b>Subjects with at least 1 unsolicited AE</b> | <b>1 722<br/>(14.3)</b> | <b>1 647<br/>(13.7)</b> | <b>1 424<br/>(12.6)</b> | <b>1 132<br/>(10.5)</b> | <b>2 735<br/>(22.7)</b> | <b>2 451<br/>(20.4)</b> |
| Influenza                                      | 43 (0.4)                | 61 (0.5)                | 110 (1.0)               | 88 (0.8)                | 152 (1.3)               | 149 (1.2)               |
| Headache                                       | 268 (2.2)               | 268 (2.2)               | 165 (1.5)               | 165 (1.5)               | 410 (3.4)               | 405 (3.4)               |
| Nasal congestion                               | 115 (1.0)               | 131 (1.1)               | 111 (1.0)               | 110 (1.0)               | 215 (1.8)               | 223 (1.9)               |
| Oropharyngeal pain                             | 76 (0.6)                | 90 (0.7)                | 75 (0.7)                | 82 (0.8)                | 147 (1.2)               | 169 (1.4)               |
| Cough                                          | 57 (0.5)                | 73 (0.6)                | 60 (0.5)                | 57 (0.5)                | 115 (1.0)               | 127 (1.1)               |
| Diarrhea                                       | 61 (0.5)                | 61 (0.5)                | 72 (0.6)                | 54 (0.5)                | 129 (1.1)               | 110 (0.9)               |
| Nausea                                         | 61 (0.5)                | 45 (0.4)                | 74 (0.7)                | 42 (0.4)                | 128 (1.1)               | 85 (0.7)                |
| Myalgia                                        | 90 (0.7)                | 67 (0.6)                | 62 (0.5)                | 43 (0.4)                | 146 (1.2)               | 109 (0.9)               |

112 *Supplementary Table S9 | Incidence of Adverse Events of Special Interest based on Serious*  
 113 *Adverse Events Reported after Vaccination with Other COVID-19 Vaccines (Safety Analysis*  
 114 *Set)*

115 ‘N’ is the total number of participants in the Safety Analysis Set who received a given  
 116 vaccination. ‘n’ is the number of a participants reporting at least 1 occurrence of the specified  
 117 event category and is shown as a percentage in brackets.

| n (%)                                  | Vaccination 1 |           | Vaccination 2 |           | Overall     |          |
|----------------------------------------|---------------|-----------|---------------|-----------|-------------|----------|
|                                        | CoVLP+ AS03   | Placebo   | CoVLP+ AS03   | Placebo   | CoVLP+ AS03 | Placebo  |
|                                        | N= 12 036     | N= 12 040 | N= 11 312     | N= 10 775 | N= 12 036   | N= 12040 |
| Acute respiratory distress syndrome    | 0             | 1 (<0.1)  | 0             | 0         | 0           | 1 (<0.1) |
| Arrhythmia                             | 1 (<0.1)      | 1 (<0.1)  | 0             | 1 (<0.1)  | 1 (<0.1)    | 2 (<0.1) |
| Myocarditis                            | 0             | 0         | 1 (<0.1)      | 1 (<0.1)  | 1 (<0.1)    | 1 (<0.1) |
| Pericarditis                           | 0             | 0         | 0             | 0         | 0           | 0        |
| Bell’s palsy                           | 1 (<0.1)      | 0         | 1 (<0.1)      | 0         | 2 (<0.1)    | 0        |
| Facial Paralysis                       | 0             | 0         | 1 (<0.1)      | 1 (<0.1)  | 1 (<0.1)    | 1 (<0.1) |
| Deep vein thrombosis                   | 0             | 0         | 1 (<0.1)      | 0         | 1 (<0.1)    | 0        |
| Embolism                               | 0             | 0         | 0             | 0         | 0           | 0        |
| Cerebral venous sinus thrombosis       | 0             | 0         | 0             | 0         | 0           | 0        |
| Thrombocytopenia                       | 0             | 0         | 0             | 0         | 0           | 0        |
| Disseminated intravascular coagulation | 0             | 0         | 0             | 0         | 0           | 0        |
| Guillain-Barré syndrome                | 0             | 0         | 0             | 0         | 0           | 0        |

118
